# Supplementary material for: Towards an asymmetric organocatalytic α-cyanation of β-ketoesters
Source: PubMed Central journal article supplement (PMC4366011; doi:10.1016/j.tetlet.2015.02.116), 2015-04-01
Supplement: mmc1.pdf [file mmc1.pdf]

# SUPPORTING INFORMATION

## Towards an asymmetric organocatalytic $\alpha$ -cyanation of $\beta$ -ketoesters

Raghunath Chowdhury, Johannes Schörgenhuber, Johanna Novacek,  
and Mario Waser\*

*Institute of Organic Chemistry, Johannes Kepler University Linz, Altenbergerstraße 69, 4040*

*Linz, Austria. Fax: +43 732 2468 8747; Tel: +43 732 2468 8748;*

*E-mail: Mario.waser@jku.at; raghuch14@gmail.com*

|                                                                 |    |
|-----------------------------------------------------------------|----|
| 1. General Information: .....                                   | 2  |
| 2. Asymmetric $\alpha$ -Cyanation of $\beta$ -Ketoesters: ..... | 3  |
| 3. Copies of NMR spectra: .....                                 | 7  |
| 4. HPLC Chromatograms: .....                                    | 16 |

## 1. General Information:

<sup>1</sup>H- and <sup>13</sup>C-NMR spectra were recorded on a Bruker Avance III 300 MHz spectrometer and on a Bruker Avance III 700 MHz spectrometer with TCI cryoprobe. All NMR spectra were referenced on the solvent peak. High resolution mass spectra were obtained using a Thermo Fisher Scientific LTQ Orbitrap XL with an Ion Max API Source. IR spectra were recorded on a Bruker Tensor 27 FT-IR spectrometer with ATR unit. Optical rotations were recorded on a Schmidt + Haensch Polarimeter Model UniPol L 1000. HPLC was performed using a Dionex Summit HPLC system with a Chiralcel OD-H (250 x 4.6 mm) or a Chiralpak AD-H (250 x 4.6 mm, 5 μm) chiral stationary phase. All chemicals were purchased from commercial suppliers and used without further purification unless otherwise stated. All reactions were performed under an Ar-atmosphere. Starting β-ketoesters **1** were either purchased from commercial suppliers or prepared according to literature-known methods.<sup>1</sup> 1-Cyano-1,2-benziodoxol-3(1*H*)-one (**2**) was prepared according to known literature procedure.<sup>2,3</sup> Cinchona alkaloids were obtained from commercial suppliers. Toluene and MTBE were distilled from Na under Ar atmosphere. Dichloromethane and Chloroform were distilled from CaH<sub>2</sub> under Ar atmosphere. Racemic products were synthesized according to the recently reported literature.<sup>3</sup>

---

1) a) Moss, T. A.; Fenwick, D. R.; Dixon, D. J. *J. Am. Chem. Soc.* **2008**, *130*, 10076-10077; b) Kim, D. Y.; Park, E. J. *Org. Lett.* **2002**, *4*, 545-547; c) Wang, X.; Lan, Q.; Shirakawa, S.; Maruoka, K. *Chem. Commun.* **2010**, *46*, 321-323.  
2) a) Zhdankin, V. V.; Kuehl, C. J.; Krasutsky, A. P.; Bolz, J. T.; Mismash, B.; Woodward, J. K.; Simonsen, A. J. *Tetrahedron Lett.* **1995**, *36*, 7975-7978; b) Akai, S.; Okuno, T.; Egi, M.; Takada, T.; Tohma, H.; Kita, Y. *Heterocycles* **1996**, *42*, 47-51.  
3) Wang, Y.-F.; Qiu, J.; Kong, D.; Gao, Y.; Lu, F.; Karmaker, P. G.; Chen, F.-X. *Org. Biomol. Chem.* **2015**, *13*, 365-368.

## 2. Asymmetric $\alpha$ -Cyanation of $\beta$ -Ketoesters:

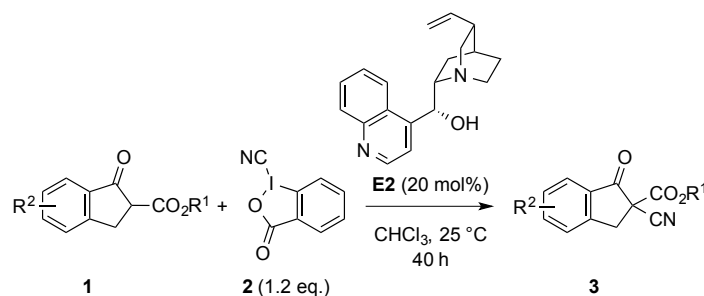

**General Procedure:** Cyano benziodoxole **2** (1.2 equiv.) was added to a stirred solution of the corresponding  $\beta$ -ketoester **1** and cinchonidine (**E2**, 20 mol%) in chloroform (5 mL per mmol **1**) at room temperature. The reaction mixture was stirred at this temperature for 40 h. The crude product was directly transferred to a silica-gel column and eluted with a gradient of heptane and EtOAc to give the products **3** in the reported yields and enantiopurities (Bromo compound **4** was isolated in 15-20% when using 20 mol% of ammonium bromide catalysts).

**Cyanide 3a.** Obtained in 70% (0.7 mmol scale) as an oil that crystallizes upon storage in the

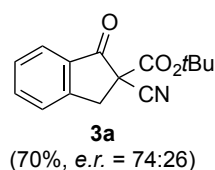

refrigerator. Analytical data match those reported previously.<sup>3</sup>

M.p.: 31-32 °C;  $[\alpha]_{\text{D}}^{20}$  (*c* = 1.2, DCM, *e.r.* = 74:26) = -15; <sup>1</sup>H NMR (300 MHz,  $\delta$ , CDCl<sub>3</sub>, 298 K): 7.83 (d, *J* = 7.8 Hz, 1H), 7.68-7.73 (m, 1H), 7.44-7.53 (m, 2H), 3.87 (d, *J* = 17.4 Hz, 1H), 3.63 (d, *J* = 17.4 Hz, 1H),

1.48 (s, 9H) ppm; <sup>13</sup>C NMR (75 MHz,  $\delta$ , CDCl<sub>3</sub>, 298 K): 191.3, 162.8, 151.7, 136.8, 132.3, 128.8, 126.4, 126.2, 116.1, 85.9, 55.2, 37.5, 27.6 (3C) ppm; IR (film):  $\bar{\nu}$  = 2977, 2935, 2245, 1723, 1148, 835, 735 cm<sup>-1</sup>; HRMS (ESI): *m/z* calcd for C<sub>15</sub>H<sub>15</sub>NO<sub>3</sub>: 280.0960 [M + Na]<sup>+</sup>; found: 280.0946. Enantiopurity was determined by HPLC (Chiralcel OD-H, eluent: hexane:*i*-PrOH = 90:10, 0.5 mL/min, 10°C, retention times: *t*<sub>minor</sub> = 15.7 min, *t*<sub>major</sub> = 16.7 min).

**Cyanide 3b.** Obtained in 78% (0.3 mmol scale) as an oily residue. Analytical data match

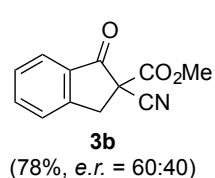

those reported elsewhere.<sup>3</sup>  $[\alpha]_{\text{D}}^{20}$  (*c* = 1.6, DCM, *e.r.* = 60:40) = -9;

<sup>1</sup>H NMR (300 MHz,  $\delta$ , CDCl<sub>3</sub>, 298 K): 7.84 (d, *J* = 7.7 Hz, 1H), 7.71-7.76 (m, 1H), 7.47-7.56 (m, 2H), 3.95 (d, *J* = 17.1 Hz, 1H), 3.88 (s, 3H), 3.69 (d, *J* = 17.1 Hz, 1H) ppm; <sup>13</sup>C NMR (75 MHz,  $\delta$ , CDCl<sub>3</sub>, 298 K): 190.6,

164.6, 151.5, 137.0, 132.0, 129.0, 126.5, 126.3, 115.7, 54.7, 54.2, 37.5 ppm; IR (film):  $\bar{\nu}$  = 2958, 2248, 1728, 1238, 906, 749 cm<sup>-1</sup>; HRMS (ESI): *m/z* calcd for C<sub>12</sub>H<sub>9</sub>NO<sub>3</sub>: 238.0486 [M + Na]<sup>+</sup>; found: 238.0478. Enantiopurity was determined by HPLC (Chiralcel OD-H, eluent: hexane:*i*-PrOH = 90:10, 0.5 mL/min, 10°C, *t*<sub>minor</sub> = 54.7 min, *t*<sub>major</sub> = 56.8 min).

**Cyanide 3c.** Obtained in 69% (0.2 mmol scale) as an oily residue;  $[\alpha]_D^{20}$  ( $c = 0.3$ , DCM, *e.r.*

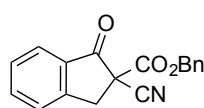

**3c**  
(69%, *e.r.* = 67:33)

$= 67:33) = -16$ ;  $^1\text{H NMR}$  (700 MHz,  $\delta$ ,  $\text{CDCl}_3$ , 298 K): 7.85 (d,  $J = 7.5$  Hz, 1H), 7.70-7.75 (m, 1H), 7.46-7.54 (m, 2H), 7.33-7.38 (m, 5H), 5.30 (d,  $J = 12.6$  Hz, 1H), 5.26 (d,  $J = 12.6$  Hz, 1H), 3.93 (d,  $J = 16.8$  Hz, 1H), 3.69 (d,  $J = 16.8$  Hz, 1H) ppm;  $^{13}\text{C NMR}$  (176 MHz,  $\delta$ ,  $\text{CDCl}_3$ , 298 K): 190.4, 163.9, 151.4, 137.0, 134.2, 132.1, 129.0, 128.72, 128.7, 128.0, 126.5, 126.4, 115.7, 69.3, 54.3, 37.5 ppm; IR (film):  $\bar{\nu} = 2968, 2244, 1726, 1598, 1371, 1254, 1015, 908, 746$   $\text{cm}^{-1}$ ; HRMS (ESI):  $m/z$  calcd for  $\text{C}_{18}\text{H}_{13}\text{NO}_3$ : 314.0796  $[\text{M} + \text{Na}]^+$ ; found: 314.0789. The enantioselectivity was determined by HPLC (Chiralcel OD-H, eluent: hexane:*i*-PrOH = 90:10, 0.5 mL/min, 10°C, retention times:  $t_{\text{minor}} = 27.9$  min,  $t_{\text{major}} = 29.6$  min).

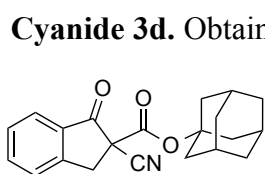

**3d**  
(80%, *e.r.* = 76:24;  
81:19 after recryst.)

**Cyanide 3d.** Obtained in 80% (0.4 mmol scale) as a white solid. Analytical data match those reported elsewhere.<sup>3</sup> M.p.: 47-50 °C;  $[\alpha]_D^{20}$  ( $c = 0.3$ , DCM, *e.r.* = 81:19) = -16;  $^1\text{H NMR}$  (300 MHz,  $\delta$ ,  $\text{CDCl}_3$ , 298 K): 7.83 (d,  $J = 7.8$  Hz, 1H), 7.68-7.73 (m, 1H), 7.44-7.53 (m, 2H), 3.87 (d,  $J = 17.4$  Hz, 1H), 3.63 (d,  $J = 17.4$  Hz, 1H), 2.16 (bs, 3H), 2.11 (bs, 6H), 1.62 (bs, 6H) ppm;  $^{13}\text{C NMR}$  (75 MHz,  $\delta$ ,  $\text{CDCl}_3$ , 298 K): 191.3, 162.3, 151.6, 136.7, 132.3, 128.8, 126.4, 126.1, 116.1, 85.8, 55.3, 40.8 (3C), 37.5, 35.8 (3C), 30.9 (3C) ppm; IR (film):  $\bar{\nu} = 2910, 2246, 1724, 1598, 835, 725$   $\text{cm}^{-1}$ ; HRMS (ESI):  $m/z$  calcd for  $\text{C}_{21}\text{H}_{21}\text{NO}_3$ : 358.1426  $[\text{M} + \text{Na}]^+$ ; found: 358.1415. The enantioselectivity was determined by HPLC (Chiralcel OD-H, eluent: hexane:*i*-PrOH = 90:10, 0.5 mL/min, 10°C, retention times:  $t_{\text{major}} = 21.0$  min,  $t_{\text{minor}} = 22.4$  min).

**Cyanide 3e.** Obtained in 77% (0.2 mmol scale) as an oily residue.  $[\alpha]_D^{20}$  ( $c = 0.7$ , DCM, *e.r.*

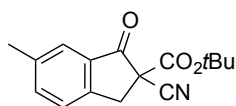

**3e**  
(77%, *e.r.* = 75:25)

$= 75:25) = -18$ ;  $^1\text{H NMR}$  (300 MHz,  $\delta$ ,  $\text{CDCl}_3$ , 298 K): 7.66 (d,  $J = 7.5$  Hz, 1H), 7.51 (d,  $J = 7.5$  Hz, 1H), 7.38 (t,  $J = 7.5$  Hz, 1H), 3.77 (d,  $J = 17.1$  Hz, 1H), 3.51 (d,  $J = 17.1$  Hz, 1H), 2.38 (s, 3H), 1.50 (s, 9H);  $^{13}\text{C NMR}$  (75 MHz,  $\delta$ ,  $\text{CDCl}_3$ , 298 K): 191.5, 162.9, 150.6, 137.3, 135.9, 132.1, 129.0, 123.6, 116.2, 85.8, 55.1, 36.5, 27.6 (3C), 17.7 ppm; IR (film):  $\bar{\nu} = 2981, 2935, 2246, 1724, 1591, 1251, 1148, 832$   $\text{cm}^{-1}$ ; HRMS (ESI):  $m/z$  calcd for  $\text{C}_{16}\text{H}_{17}\text{NO}_3$ : 294.1107  $[\text{M} + \text{Na}]^+$ ; found: 294.1104. The enantioselectivity was determined by HPLC (Chiralcel OD-H, eluent: hexane:*i*-PrOH = 90:10, 0.5 mL/min, 10°C, retention times:  $t_{\text{minor}} = 15.2$  min,  $t_{\text{major}} = 17.6$  min).

**Cyanide 3f.** Obtained in 78% (0.3 mmol scale) as an oily residue.  $[\alpha]_D^{20}$  ( $c = 1.3$ , DCM, *e.r.*

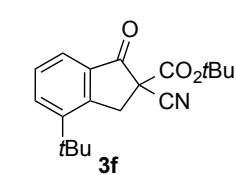

(78%, *e.r.* = 75:25)

$= 75:25) = -9$ ;  $^1\text{H NMR}$  (300 MHz,  $\delta$ ,  $\text{CDCl}_3$ , 298 K): 7.81-7.82 (m, 1H), 7.76 (dd,  $J = 1.8, 8.1$  Hz, 1H), 7.44-7.46 (m, 1H), 3.83 (d,  $J = 17.1$  Hz, 1H), 3.59 (d,  $J = 17.1$  Hz, 1H), 1.50 (s, 9H), 1.34 (s, 9H) ppm;  $^{13}\text{C NMR}$

(75 MHz,  $\delta$ ,  $\text{CDCl}_3$ , 298 K): 191.5, 163.0, 152.5, 149.2, 134.8, 132.2, 126.0, 122.3, 116.3, 85.7, 55.5, 37.1, 34.9, 31.2 (3C), 27.6 (3C) ppm; IR (film):  $\bar{\nu} = 2982, 2934, 2245, 1725, 1591, 1250, 1147, 831$   $\text{cm}^{-1}$ ; HRMS (ESI):  $m/z$  calcd for  $\text{C}_{19}\text{H}_{23}\text{NO}_3$ : 336.1580  $[\text{M} + \text{Na}]^+$ ; found: 336.1570. The enantioselectivity was determined by HPLC (Chiralcel OD-H, eluent: hexane:*i*-PrOH = 90:10, 0.5 mL/min, 10°C, retention times:  $t_{\text{minor}} = 10.4$  min,  $t_{\text{major}} = 12.4$  min).

**Cyanide 3g.** Obtained in 86% (0.3 mmol scale) as an oily residue.  $[\alpha]_D^{20}$  ( $c = 1.2$ , DCM, *e.r.*

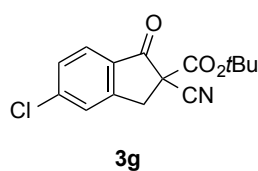

(86%, *e.r.* = 73:27)

$= 73:27) = -12$ ;  $^1\text{H NMR}$  (300 MHz,  $\delta$ ,  $\text{CDCl}_3$ , 298 K): 7.76 (d,  $J = 8.1$  Hz, 1H), 7.52-7.54 (m, 1H), 7.43-7.47 (m, 1H), 3.85 (d,  $J = 17.4$  Hz, 1H), 3.60 (d,  $J = 17.4$  Hz, 1H), 1.49 (s, 9H) ppm;  $^{13}\text{C NMR}$  (75 MHz,  $\delta$ ,  $\text{CDCl}_3$ , 298 K): 189.8, 162.5, 153.0, 143.7, 130.7, 129.7, 127.1,

126.7, 115.7, 86.2, 55.2, 37.0, 27.6 (3C) ppm; IR (film):  $\bar{\nu} = 2980, 2245, 1723, 1598, 1371, 1253, 1219, 1016, 907, 886$   $\text{cm}^{-1}$ ; HRMS (ESI):  $m/z$  calcd for  $\text{C}_{15}\text{H}_{14}\text{ClNO}_3$ : 314.0570  $[\text{M} + \text{Na}]^+$ ; found: 314.0559. The enantioselectivity was determined by HPLC (Chiralpak AD-H, eluent: hexane:*i*-PrOH = 90:10, 0.8 mL/min, 10°C, retention times:  $t_{\text{minor}} = 12.2$  min,  $t_{\text{major}} = 13.3$  min).

**Cyanide 3h.** Obtained in 81% (0.2 mmol scale) as an oily residue.  $[\alpha]_D^{20}$  ( $c = 0.4$ , DCM, *e.r.*

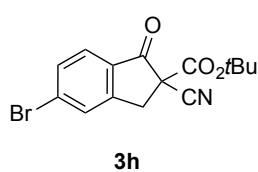

(81%, *e.r.* = 73:27)

$= 73:27) = -11$ ;  $^1\text{H NMR}$  (300 MHz,  $\delta$ ,  $\text{CDCl}_3$ , 298 K): 7.76 (d,  $J = 8.1$  Hz, 1H), 7.53 (s, 1H), 7.43-7.47 (m, 1H), 3.85 (d,  $J = 17.4$  Hz, 1H), 3.60 (d,  $J = 17.4$  Hz, 1H), 1.49 (s, 9H) ppm;  $^{13}\text{C NMR}$  (75 MHz,  $\delta$ ,  $\text{CDCl}_3$ , 298 K): 190.0, 162.4, 153.0, 132.7, 132.6, 131.1, 129.8, 127.1,

115.7, 86.2, 55.2, 37.0, 27.6 (3C) ppm; IR (film):  $\bar{\nu} = 2978, 2246, 1725, 1598, 1371, 1252, 1219, 1016, 865, 840$   $\text{cm}^{-1}$ ; HRMS (ESI):  $m/z$  calcd for  $\text{C}_{15}\text{H}_{14}\text{BrNO}_3$ : 358.0065  $[\text{M} + \text{Na}]^+$ ; found: 358.0050. The enantioselectivity was determined by HPLC (Chiralpak AD-H, eluent: hexane:*i*-PrOH = 90:10, 0.8 mL/min, 10°C, retention times:  $t_{\text{minor}} = 11.7$  min,  $t_{\text{major}} = 12.7$  min).

**Bromide 4.** Isolated in 15-20% when using 20 mol% of ammonium bromide catalysts.

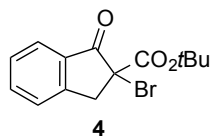

Analytical data are in accordance to those reported in literature.<sup>4</sup> <sup>1</sup>H NMR

(300 MHz,  $\delta$ , CDCl<sub>3</sub>, 298 K): 7.79 (d,  $J$  = 7.8 Hz, 1H), 7.67-7.57 (m, 1H), 7.43-7.33 (m, 2H), 4.05 (d,  $J$  = 18.0 Hz, 1H), 3.58 (d,  $J$  = 18.0 Hz, 1H),

1.39 (s, 9H) ppm; <sup>13</sup>C NMR (75 MHz,  $\delta$ , CDCl<sub>3</sub>, 298 K): 195.6, 165.8,

150.3, 136.1, 132.5, 128.4, 126.2, 125.9, 84.5, 59.9, 44.0, 27.7 (3C) ppm; HRMS (ESI):  $m/z$

calcd for C<sub>14</sub>H<sub>15</sub>BrO<sub>3</sub>: 328.0543 [M + NH<sub>4</sub>]<sup>+</sup>; found: 328.0542.

4) Liu, G.; Wang, X.; Lu, X.; Xu, X.-H.; Tokunaga, E.; Shibata, N. *ChemistryOpen* **2012**, *1*, 227-231.

### 3. Copies of NMR spectra:

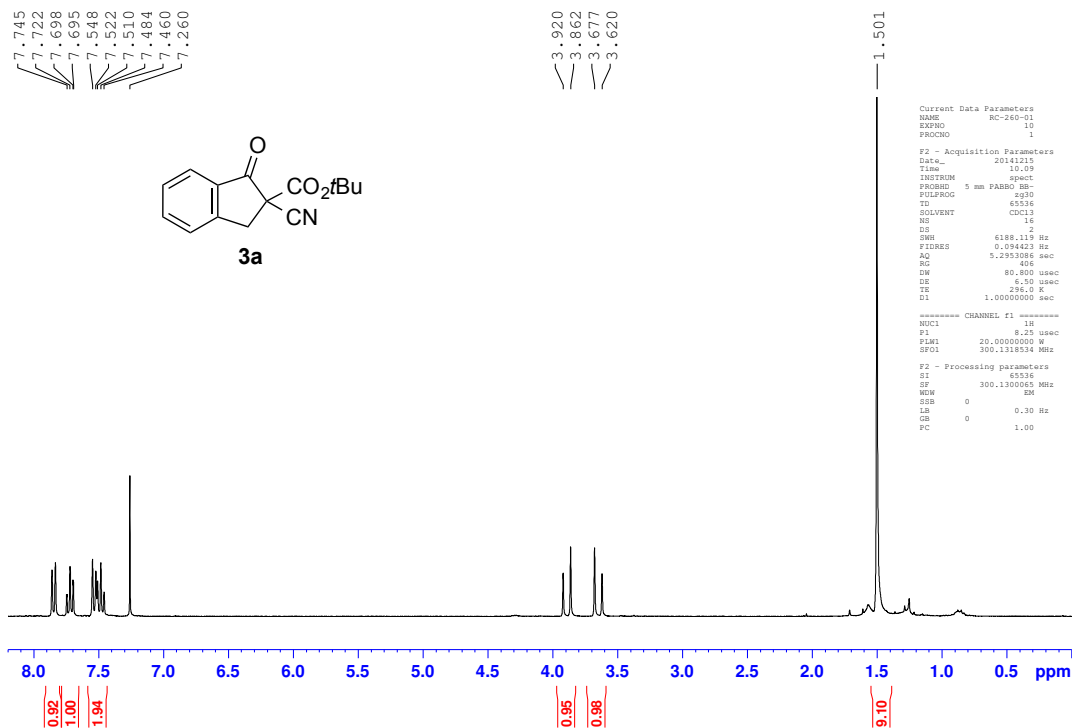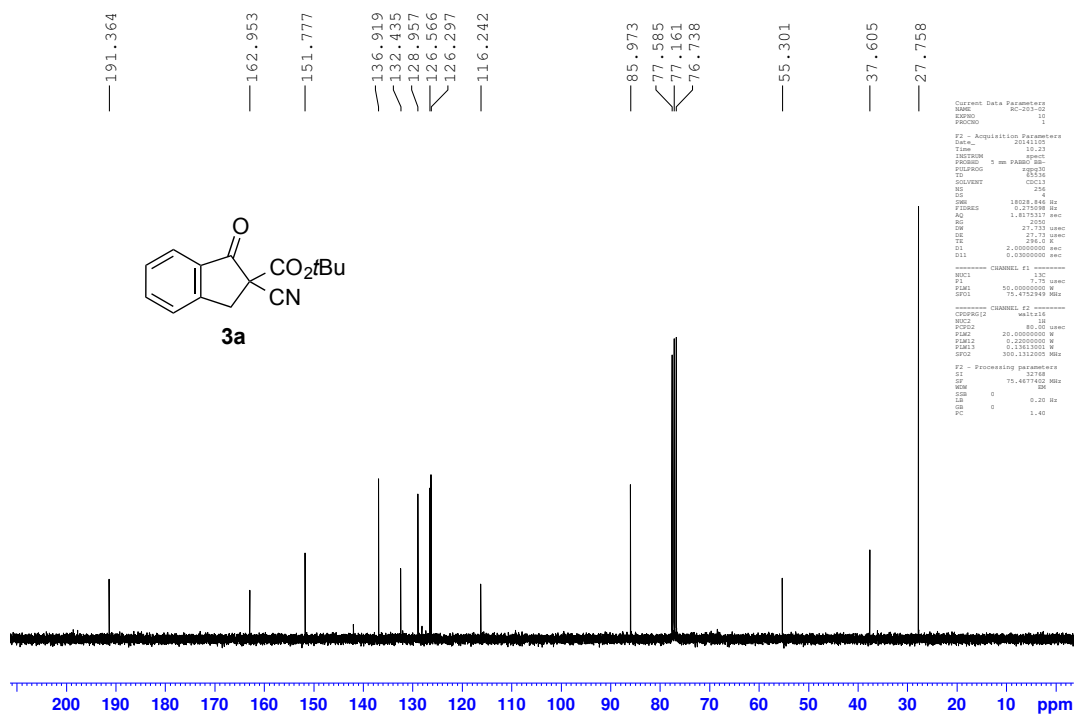

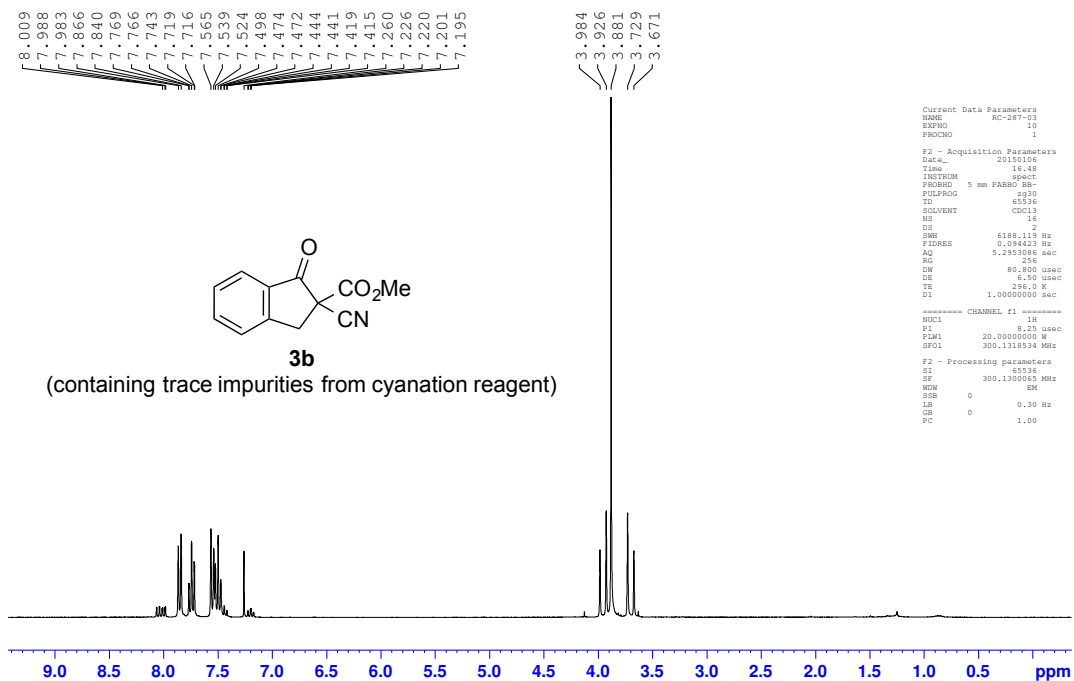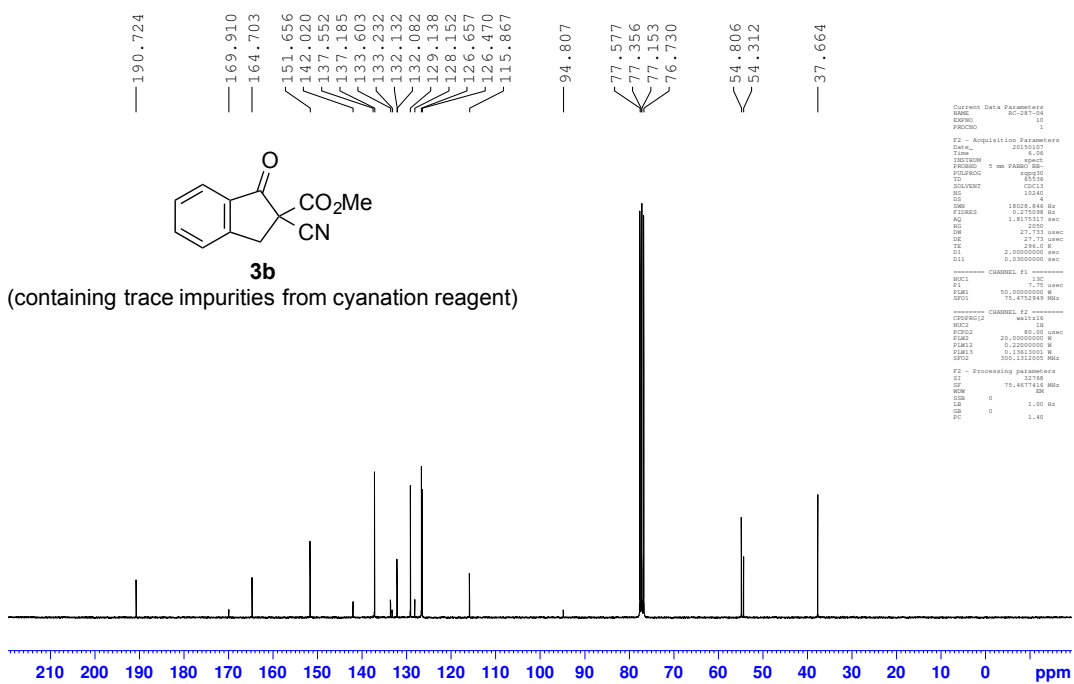



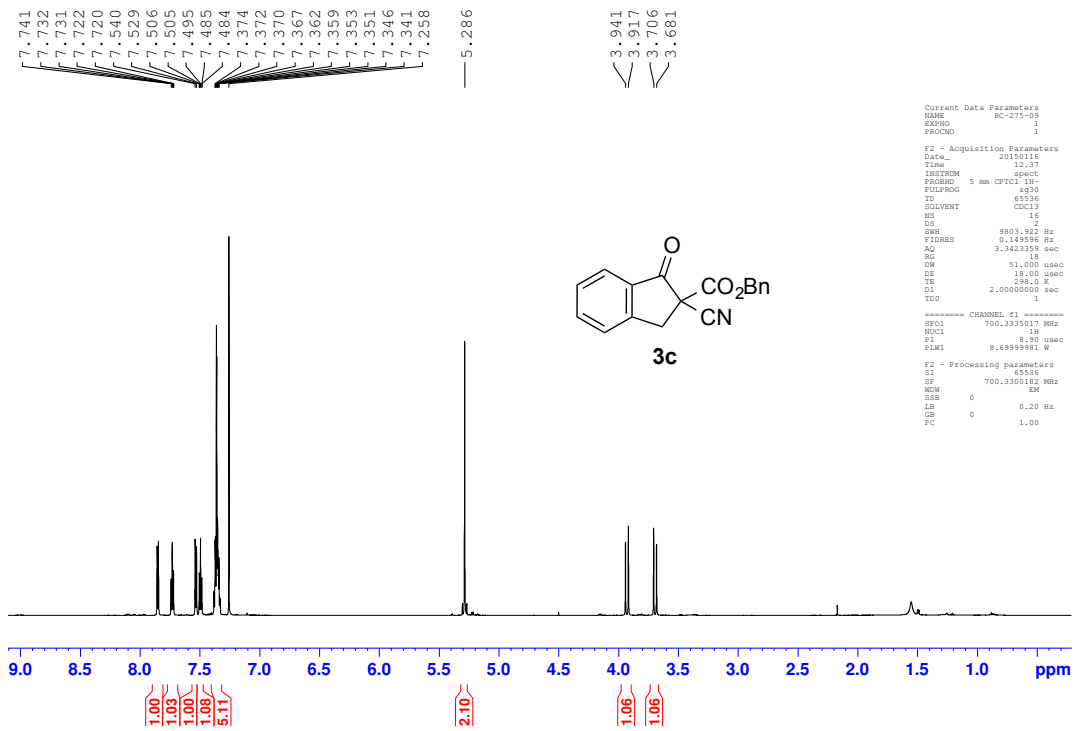

```

Current Data Parameters
NAME      RC-215-09
EXPNO    1
PROCNO   1

F2 - Acquisition Parameters
Date_    20130116
Time     12:37
INSTRUM spect
PROBHD   5 mm CP1Q1 1H-
PULPROG zg30
TD        65536
SOLVENT  CDCl3
NS        16
DS        4
SWH       9803.922 Hz
FIDRES    0.149596 Hz
AQ        3.3421359 sec
RG        18
DM        51.000 usec
DE        18.00 usec
TE        298.0 K
D1        2.0000000 sec
TD0       1

===== CHANNEL f1 =====
SFO1     700.3335017 MHz
NUC1     13C
PI1      8.90 usec
P1A1     8.6999981

F2 - Processing parameters
SI        65536
SF        700.3300181 MHz
WDW       EM
SSB       0
LB        0.20 Hz
GB        0
PC        1.00
  
```

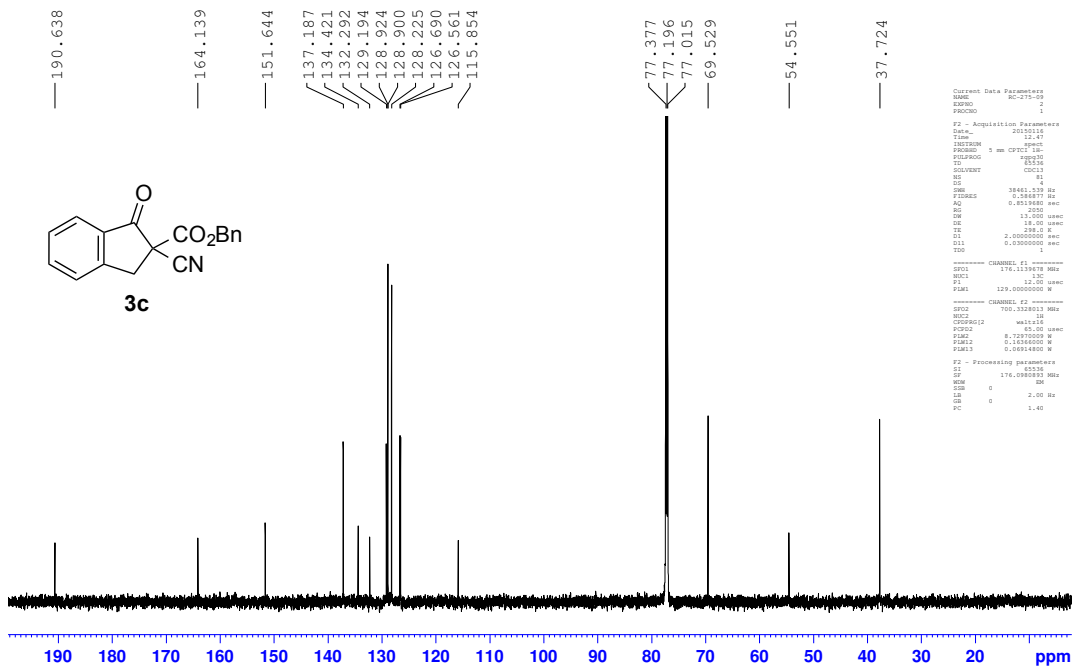

```

Current Data Parameters
NAME      RC-215-09
EXPNO    1
PROCNO   1

F2 - Acquisition Parameters
Date_    20130116
Time     12:37
INSTRUM spect
PROBHD   5 mm CP1Q1 1H-
PULPROG zg30
TD        65536
SOLVENT  CDCl3
NS        16
DS        4
SWH       30461.339 Hz
FIDRES    0.268871 Hz
AQ        0.8513880 sec
RG        3000
DM        131.000 usec
DE        18.00 usec
TE        298.0 K
D1        2.0000000 sec
D11      0.3000000 sec
TD0       1

===== CHANNEL f1 =====
SFO1     176.1139878 MHz
NUC1     13C
PI1      9.10 usec
P1A1     129.0000000 MHz

===== CHANNEL f2 =====
SFO2     700.3300181 MHz
NUC2     13C
P2A1     9.10 usec
P2A2     8.7390000 MHz
P2A3     0.14048000 MHz
P2A4     0.06914800 MHz

F2 - Processing parameters
SI        65536
SF        176.05333 MHz
WDW       EM
SSB       0
LB        0.20 Hz
GB        0
PC        1.40
  
```

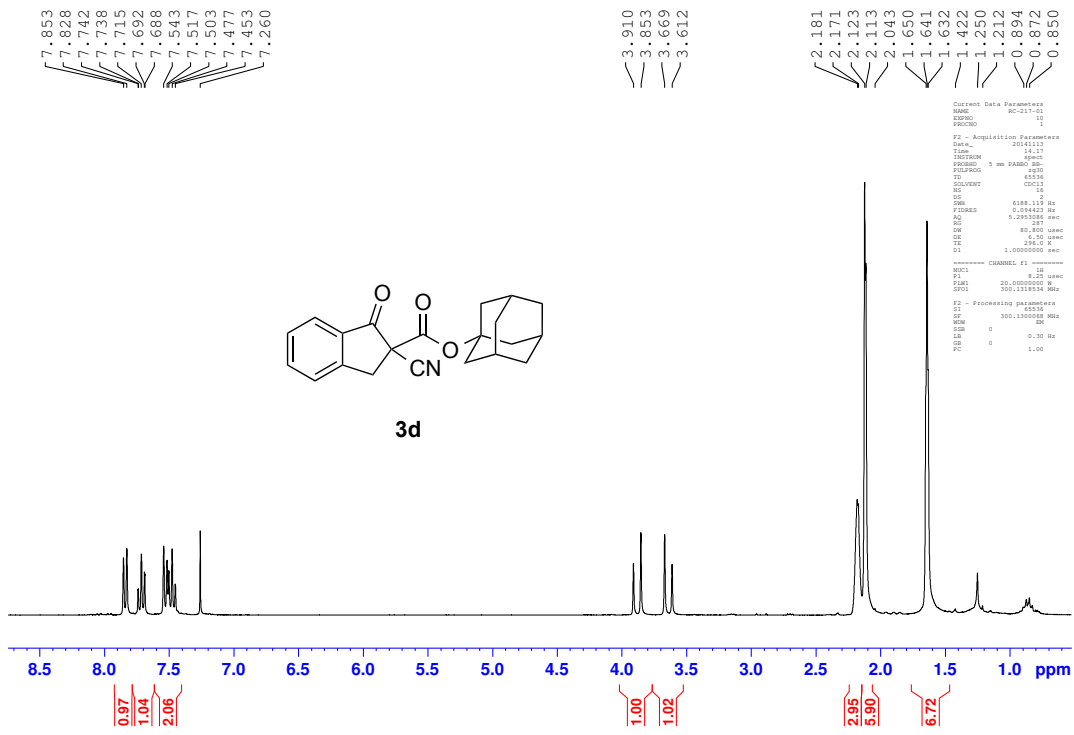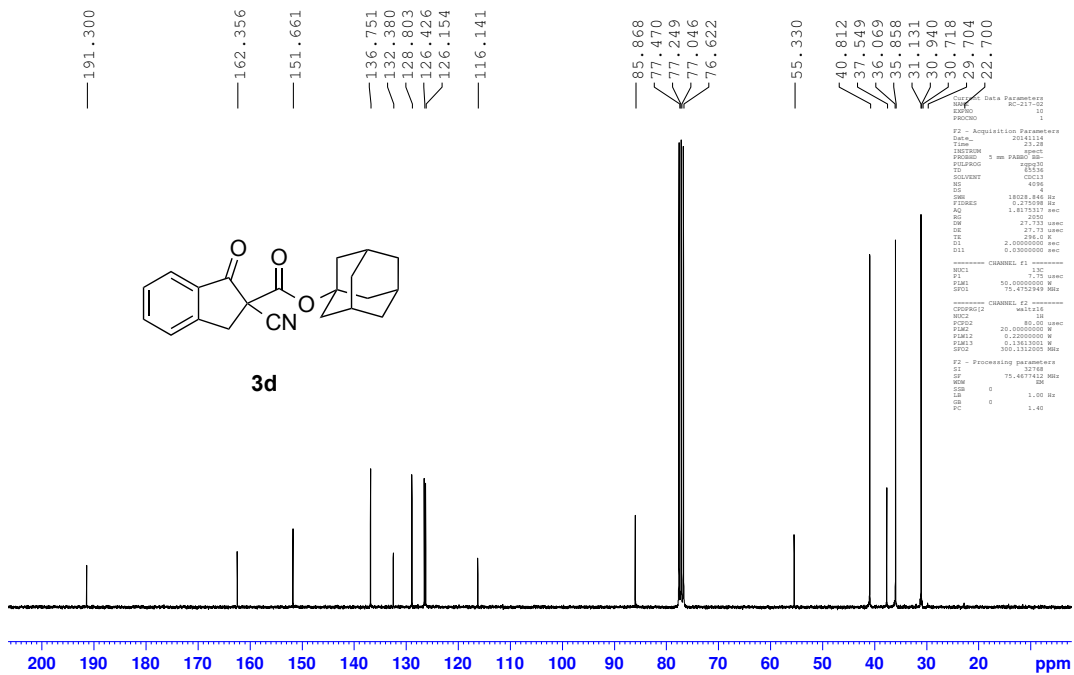

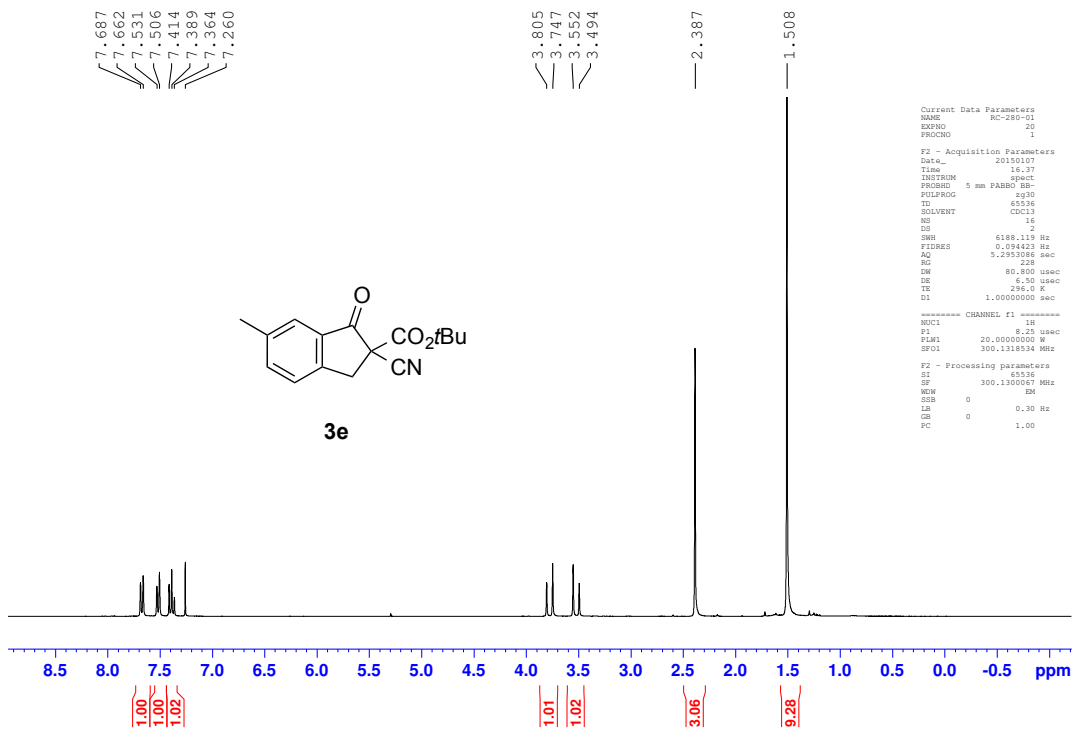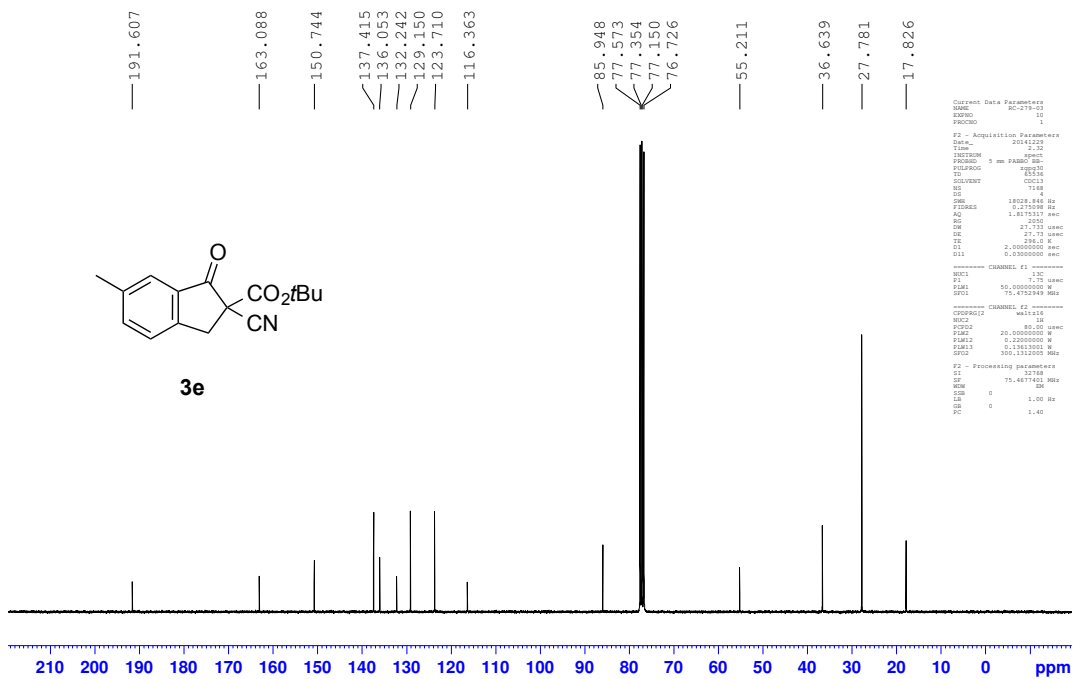

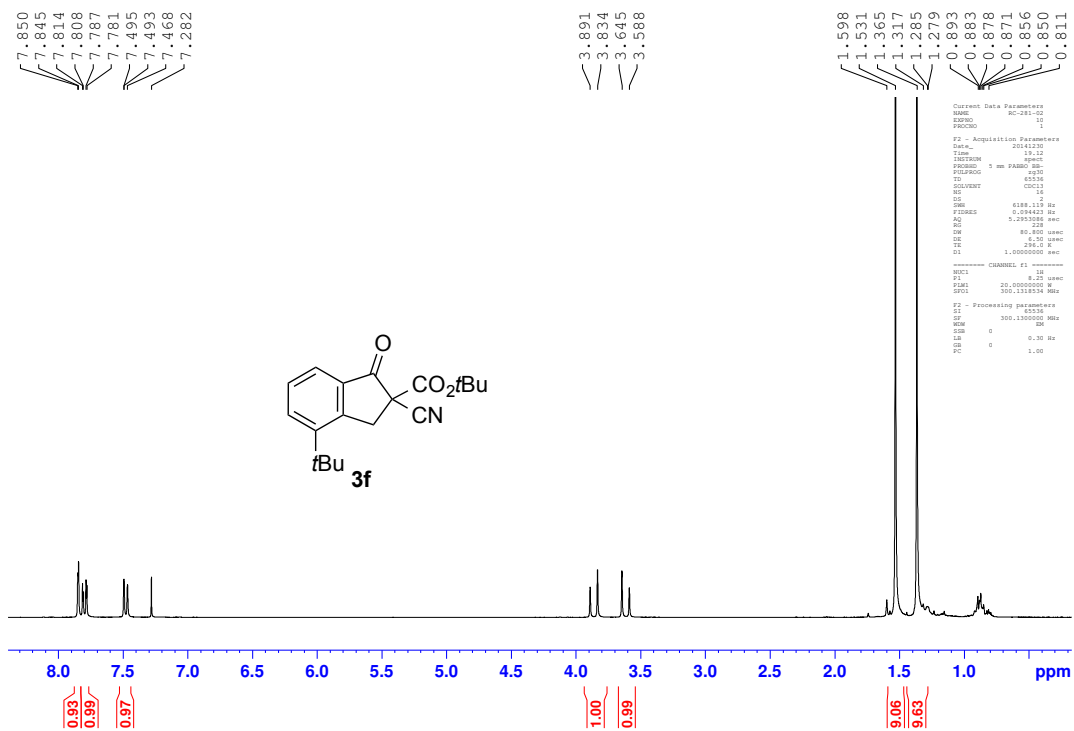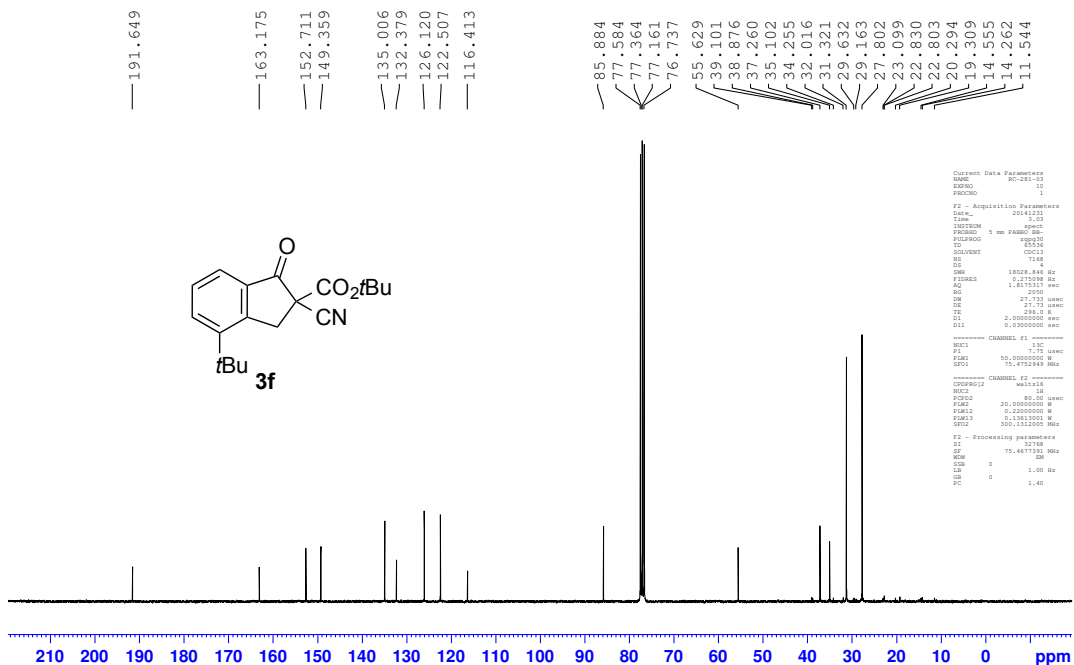

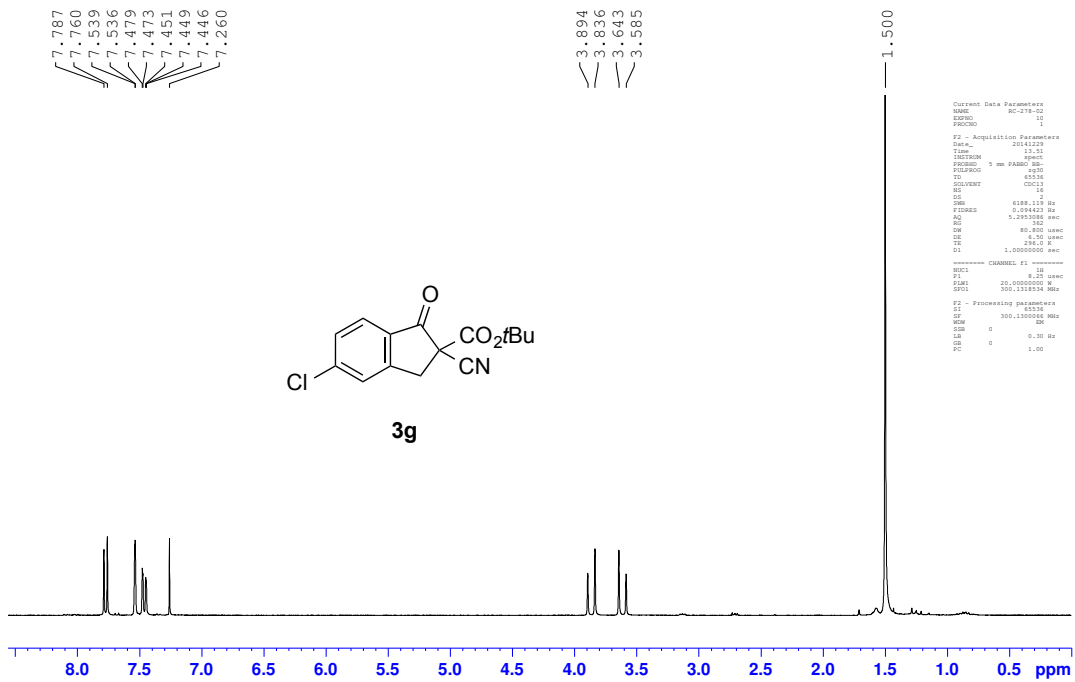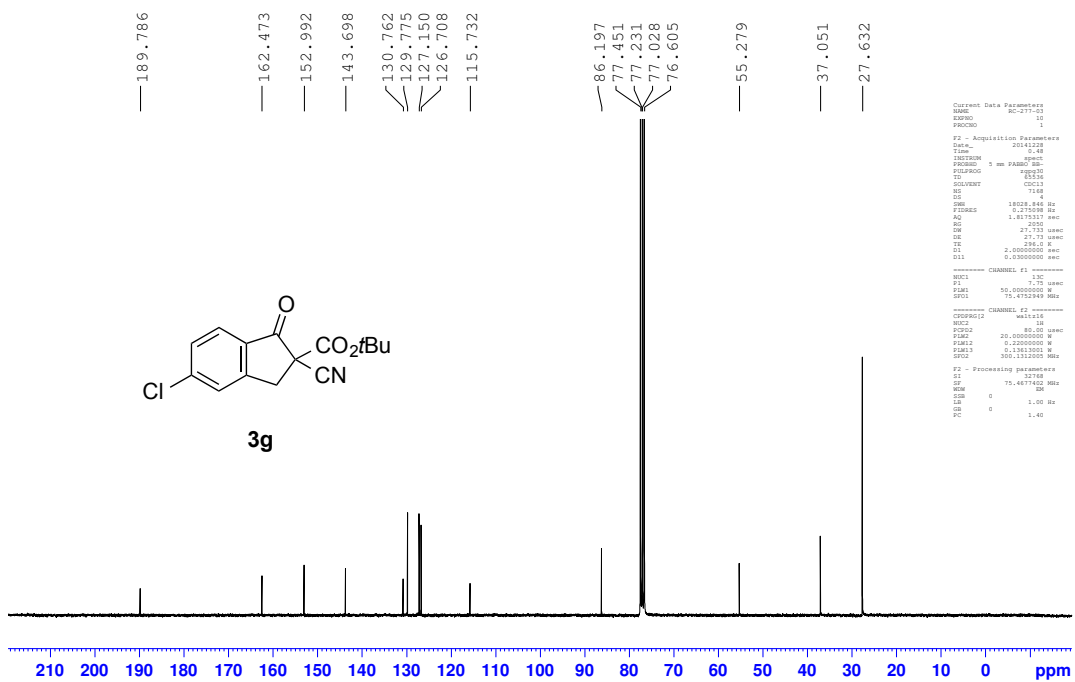

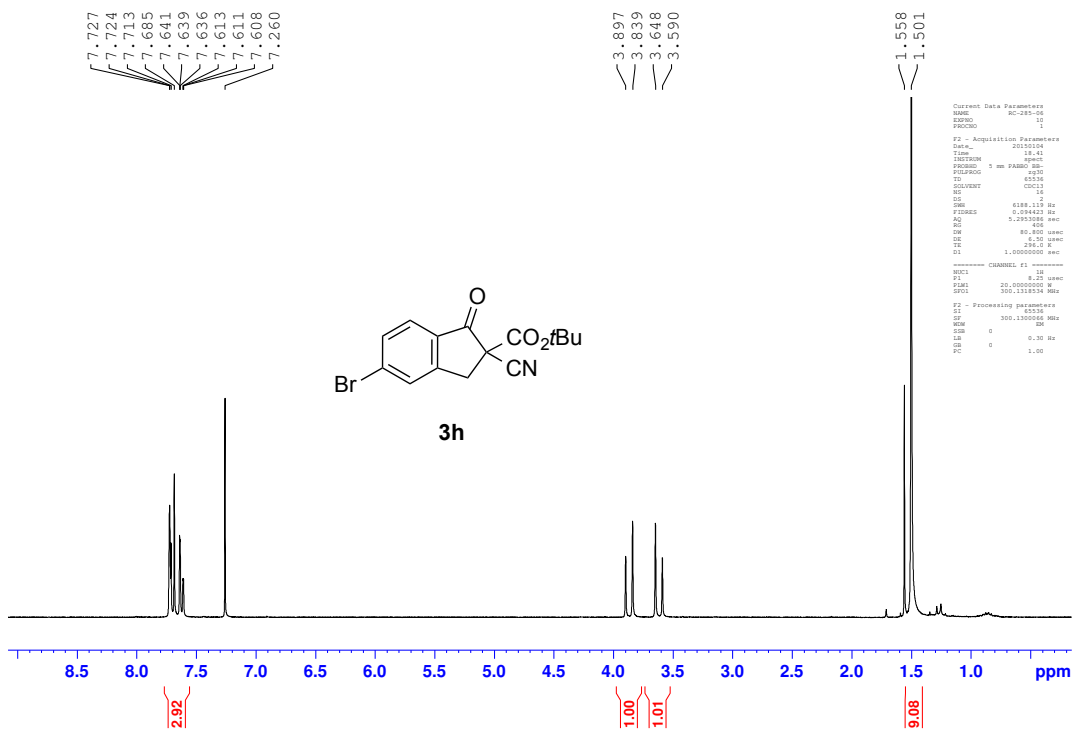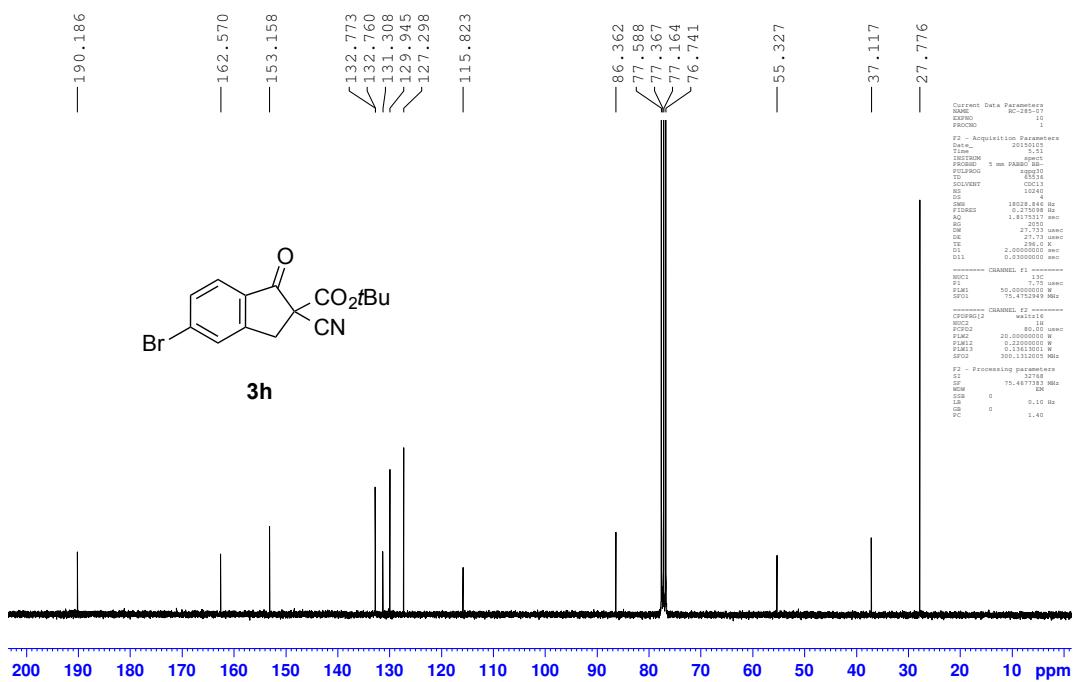

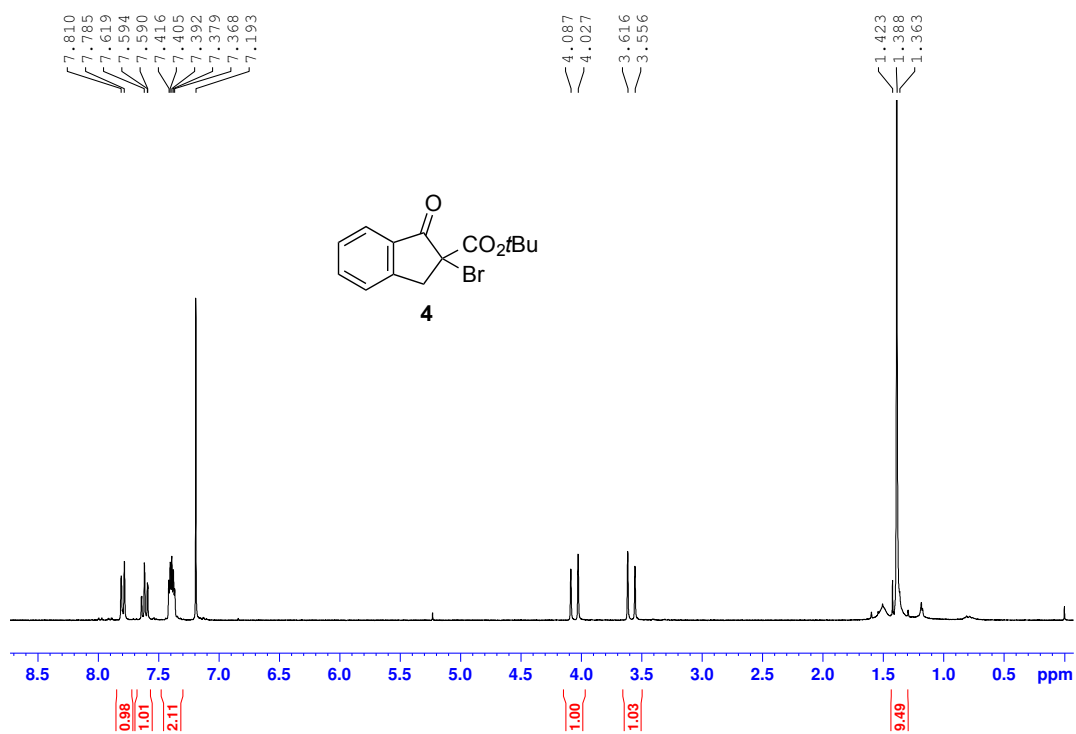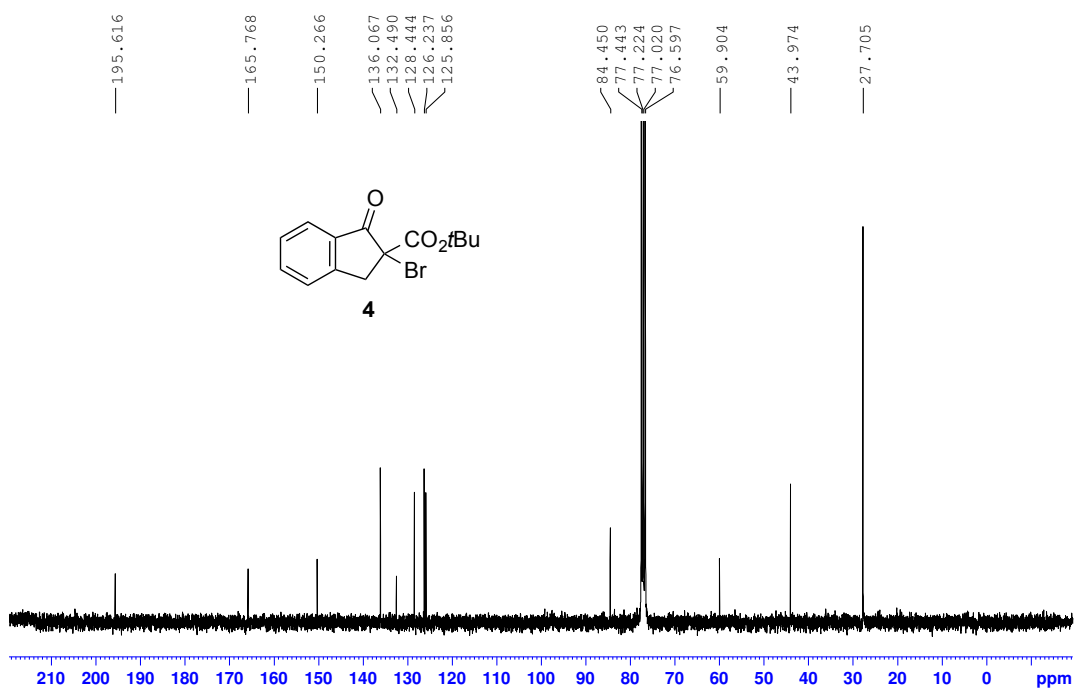

## 4. HPLC Chromatograms:

Operator:Admin Timebase:Summit\_1 Sequence:WAS\_20141107\_RC\_ODH

Page 1-2  
6.1.2015 3:47 PM

### 2 RC-203

|                  |                       |                     |          |
|------------------|-----------------------|---------------------|----------|
| Sample Name:     | RC-203                | Injection Volume:   | 10,0     |
| Vial Number:     | RA1                   | Channel:            | UV_VIS_2 |
| Sample Type:     | unknown               | Wavelength:         | 250      |
| Control Program: | OD_H_90Min_9_1_flow05 | Bandwidth:          | n.a.     |
| Quantif. Method: | OD_H                  | Temperature/Column: | 10       |
| Recording Time:  | 7.11.2014 12:16       | Flow ml/min:        | 0,500    |
| Run Time (min):  | 35,75                 | Sample Amount:      | 1,0000   |

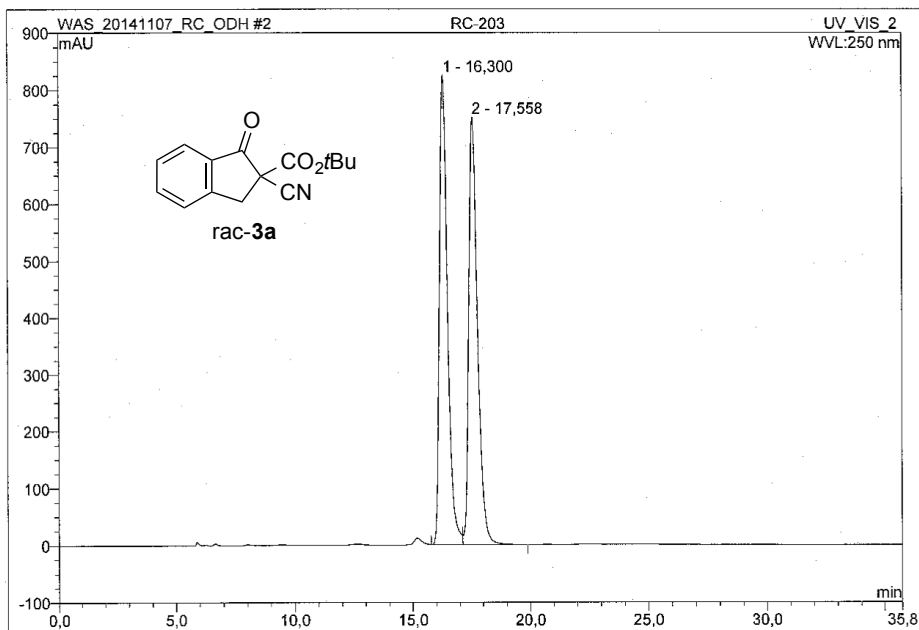

| No.           | Ret.Time<br>min | Peak Name | Height<br>mAU | Area<br>mAU*min | Rel.Area<br>% | Amount | Type |
|---------------|-----------------|-----------|---------------|-----------------|---------------|--------|------|
| 1             | 16,30           | n.a.      | 824,801       | 326,891         | 49,71         | n.a.   | BM   |
| 2             | 17,56           | n.a.      | 751,079       | 330,686         | 50,29         | n.a.   | MB   |
| <b>Total:</b> |                 |           | 1575,880      | 657,578         | 100,00        | 0,000  |      |

default/Integration

Chromeleon (c) Dionex 1996-2006  
Version 6.80 SR12 Build 3578 (207169)



**3 RC-255**

|                  |                       |                     |          |
|------------------|-----------------------|---------------------|----------|
| Sample Name:     | RC-255                | Injection Volume:   | 10,0     |
| Vial Number:     | RA3                   | Channel:            | UV_VIS_2 |
| Sample Type:     | unknown               | Wavelength:         | 250      |
| Control Program: | OD_H_30Min_9_1_flow05 | Bandwidth:          | n.a.     |
| Quantif. Method: | OD_H                  | Temperature/Column: | 10       |
| Recording Time:  | 11.12.2014 14:51      | Flow ml/min:        | 0,500    |
| Run Time (min):  | 30,00                 | Sample Amount:      | 1,0000   |

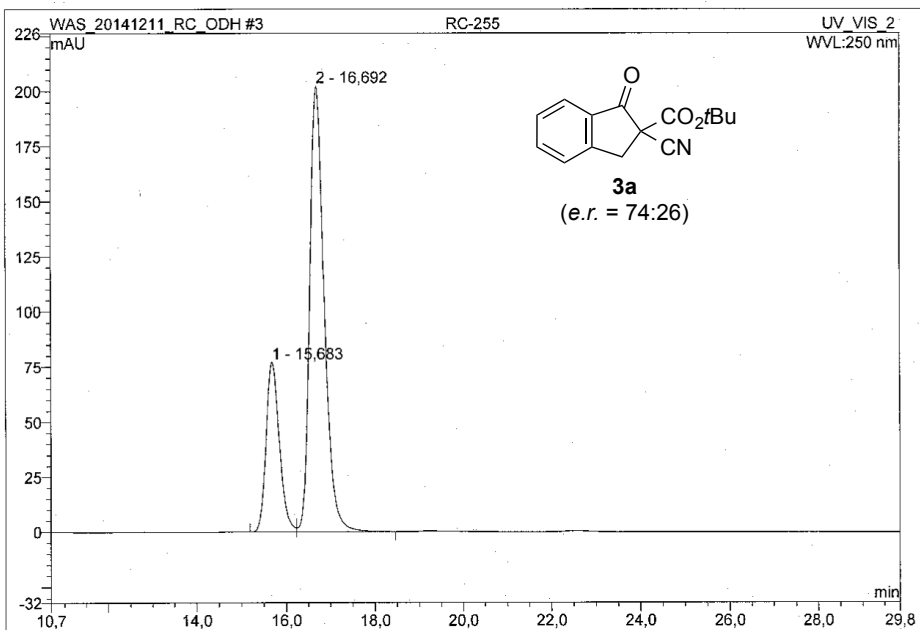

| No.           | Ret.Time<br>min | Peak Name | Height<br>mAU | Area<br>mAU*min | Rel.Area<br>% | Amount | Type |
|---------------|-----------------|-----------|---------------|-----------------|---------------|--------|------|
| 1             | 15,68           | n.a.      | 77,155        | 26,822          | 25,80         | n.a.   | BM   |
| 2             | 16,69           | n.a.      | 202,327       | 77,141          | 74,20         | n.a.   | MB   |
| <b>Total:</b> |                 |           | 279,482       | 103,963         | 100,00        | 0,000  |      |

**4 RC-264**

|                  |                       |                     |          |
|------------------|-----------------------|---------------------|----------|
| Sample Name:     | RC-264                | Injection Volume:   | 10,0     |
| Vial Number:     | RA4                   | Channel:            | UV_VIS_2 |
| Sample Type:     | unknown               | Wavelength:         | 250      |
| Control Program: | OD_H_60Min_7_3_flow05 | Bandwidth:          | n.a.     |
| Quantif. Method: | OD_H                  | Temperature/Column: | 10       |
| Recording Time:  | 18.12.2014 14:38      | Flow ml/min:        | 0,500    |
| Run Time (min):  | 60,00                 | Sample Amount:      | 1,0000   |

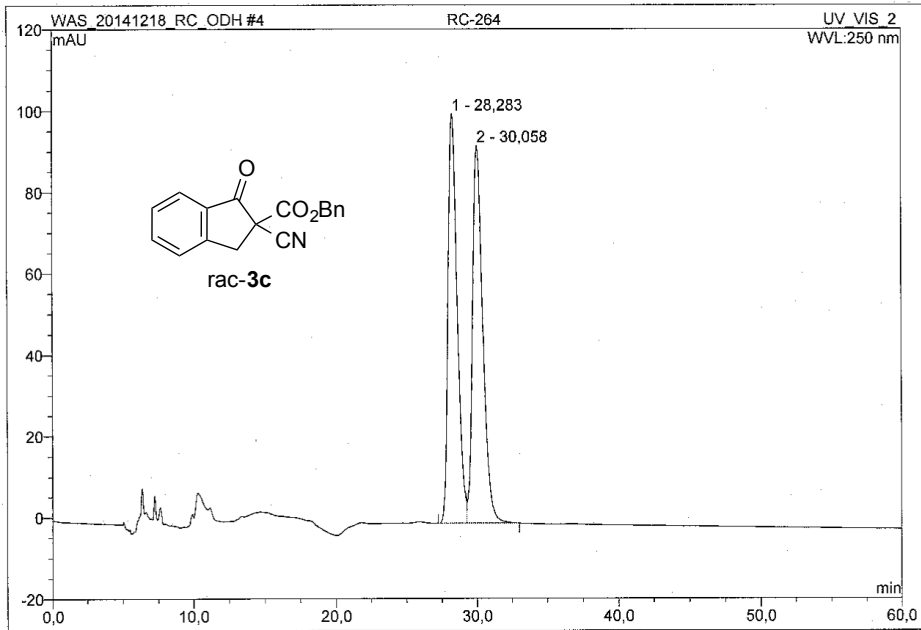

| No.           | Ret.Time<br>min | Peak Name | Height<br>mAU | Area<br>mAU*min | Rel.Area<br>% | Amount | Type |
|---------------|-----------------|-----------|---------------|-----------------|---------------|--------|------|
| 1             | 28,28           | n.a.      | 100,853       | 76,333          | 49,29         | n.a.   | BM   |
| 2             | 30,06           | n.a.      | 92,980        | 78,531          | 50,71         | n.a.   | MB   |
| <b>Total:</b> |                 |           | 193,833       | 154,865         | 100,00        | 0,000  |      |

**2 RC-275-1**

|                  |                       |                     |          |
|------------------|-----------------------|---------------------|----------|
| Sample Name:     | RC-275-1              | Injection Volume:   | 10,0     |
| Vial Number:     | RA2                   | Channel:            | UV_VIS_2 |
| Sample Type:     | unknown               | Wavelength:         | 250      |
| Control Program: | OD_H_60Min_7_3_flow05 | Bandwidth:          | n.a.     |
| Quantif. Method: | OD_H                  | Temperature/Column: | 10       |
| Recording Time:  | 25.12.2014 15:33      | Flow ml/min:        | 0,500    |
| Run Time (min):  | 58,84                 | Sample Amount:      | 1,0000   |

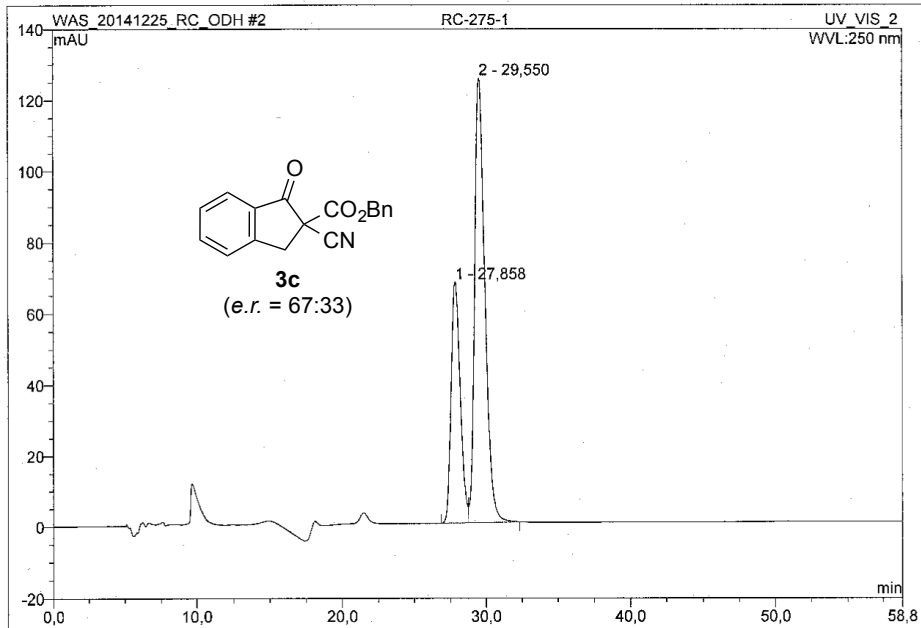

| No.           | Ret. Time<br>min | Peak Name | Height<br>mAU | Area<br>mAU*min | Rel.Area<br>% | Amount | Type |
|---------------|------------------|-----------|---------------|-----------------|---------------|--------|------|
| 1             | 27,86            | n.a.      | 67,809        | 50,011          | 32,71         | n.a.   | BM   |
| 2             | 29,55            | n.a.      | 124,991       | 102,879         | 67,29         | n.a.   | MB   |
| <b>Total:</b> |                  |           | 192,800       | 152,890         | 100,00        | 0,000  |      |

**2 RC-217**

|                  |                       |                     |          |
|------------------|-----------------------|---------------------|----------|
| Sample Name:     | RC-217                | Injection Volume:   | 10,0     |
| Vial Number:     | RA2                   | Channel:            | UV_VIS_2 |
| Sample Type:     | unknown               | Wavelength:         | 250      |
| Control Program: | OD_H_60Min_9_1_flow05 | Bandwidth:          | n.a.     |
| Quantif. Method: | OD_H                  | Temperature/Column: | 10       |
| Recording Time:  | 13.11.2014 15:05      | Flow ml/min:        | 0,500    |
| Run Time (min):  | 60,00                 | Sample Amount:      | 1,0000   |

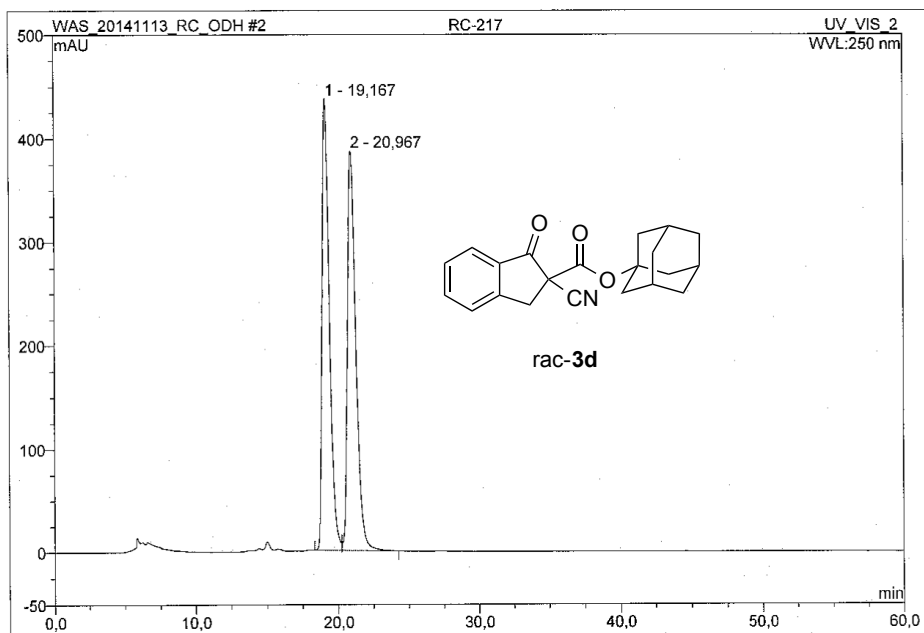

| No.           | Ret.Time<br>min | Peak Name | Height<br>mAU | Area<br>mAU*min | Rel.Area<br>% | Amount | Type |
|---------------|-----------------|-----------|---------------|-----------------|---------------|--------|------|
| 1             | 19,17           | n.a.      | 436,767       | 258,914         | 49,42         | n.a.   | BM   |
| 2             | 20,97           | n.a.      | 386,856       | 265,010         | 50,58         | n.a.   | MB   |
| <b>Total:</b> |                 |           | 823,623       | 523,924         | 100,00        | 0,000  |      |

**2 RC-274**

|                  |                       |                     |          |
|------------------|-----------------------|---------------------|----------|
| Sample Name:     | RC-274                | Injection Volume:   | 10,0     |
| Vial Number:     | RA2                   | Channel:            | UV_VIS_2 |
| Sample Type:     | unknown               | Wavelength:         | 250      |
| Control Program: | OD_H_30Min_9_1_flow05 | Bandwidth:          | n.a.     |
| Quantif. Method: | OD_H                  | Temperature/Column: | 10       |
| Recording Time:  | 24.12.2014 18:40      | Flow ml/min:        | 0,500    |
| Run Time (min):  | 30,00                 | Sample Amount:      | 1,0000   |

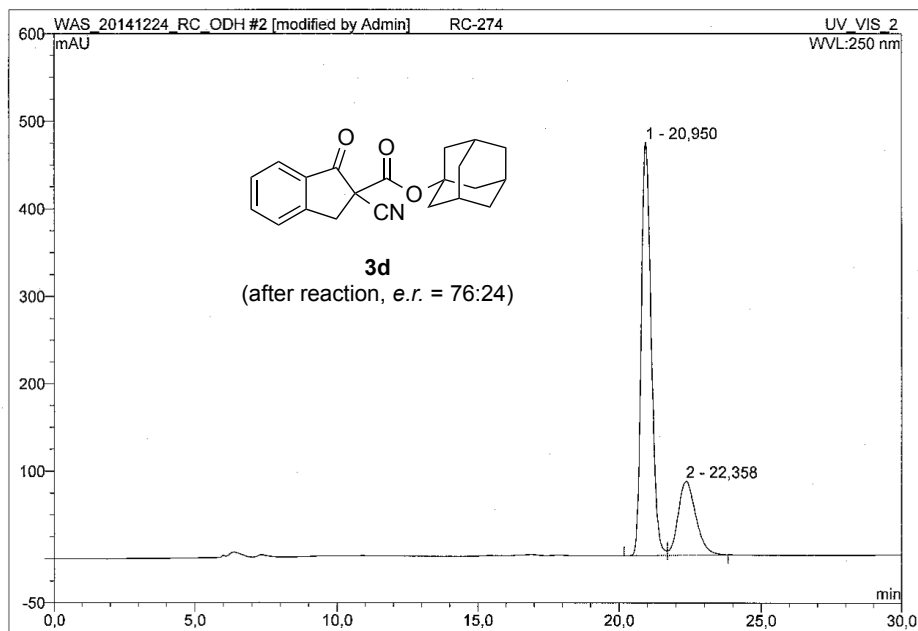

| No.           | Ret.Time<br>min | Peak Name | Height<br>mAU | Area<br>mAU*min | Rel.Area<br>% | Amount | Type |
|---------------|-----------------|-----------|---------------|-----------------|---------------|--------|------|
| 1             | 20,95           | n.a.      | 472,337       | 190,396         | 75,97         | n.a.   | BM * |
| 2             | 22,36           | n.a.      | 84,577        | 60,226          | 24,03         | n.a.   | MB*  |
| <b>Total:</b> |                 |           | 556,914       | 250,622         | 100,00        | 0,000  |      |

**1 RC-274**

|                  |                       |                     |          |
|------------------|-----------------------|---------------------|----------|
| Sample Name:     | RC-274                | Injection Volume:   | 10,0     |
| Vial Number:     | RA1                   | Channel:            | UV_VIS_2 |
| Sample Type:     | unknown               | Wavelength:         | 250      |
| Control Program: | OD_H_30Min_9_1_flow05 | Bandwidth:          | n.a.     |
| Quantif. Method: | OD_H                  | Temperature/Column: | 10       |
| Recording Time:  | 30.12.2014 15:17      | Flow ml/min:        | 0,500    |
| Run Time (min):  | 30,00                 | Sample Amount:      | 1,0000   |

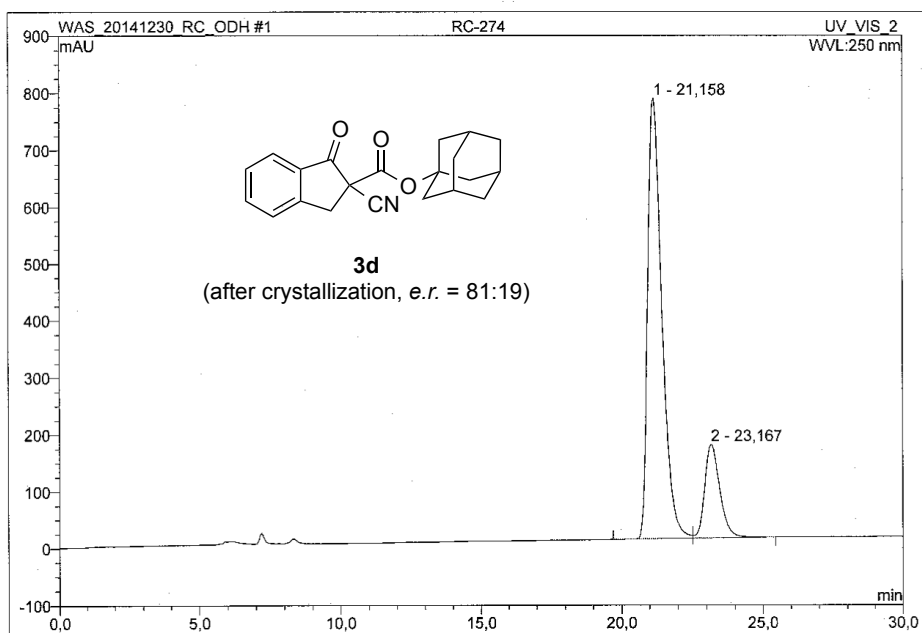

| No.           | Ret.Time<br>min | Peak Name | Height<br>mAU | Area<br>mAU*min | Rel.Area<br>% | Amount | Type |
|---------------|-----------------|-----------|---------------|-----------------|---------------|--------|------|
| 1             | 21,16           | n.a.      | 774,331       | 448,082         | 81,48         | n.a.   | BM   |
| 2             | 23,17           | n.a.      | 165,084       | 101,861         | 18,52         | n.a.   | MB   |
| <b>Total:</b> |                 |           | 939,414       | 549,944         | 100,00        | 0,000  |      |

**3 RC-279**

|                  |                       |                     |          |
|------------------|-----------------------|---------------------|----------|
| Sample Name:     | RC-279                | Injection Volume:   | 10,0     |
| Vial Number:     | RA3                   | Channel:            | UV_VIS_1 |
| Sample Type:     | unknown               | Wavelength:         | 220      |
| Control Program: | OD_H_30Min_9_1_flow05 | Bandwidth:          | n.a.     |
| Quantif. Method: | OD_H                  | Temperature/Column: | 10       |
| Recording Time:  | 29.12.2014 16:57      | Flow ml/min:        | 0,500    |
| Run Time (min):  | 30,00                 | Sample Amount:      | 1,0000   |

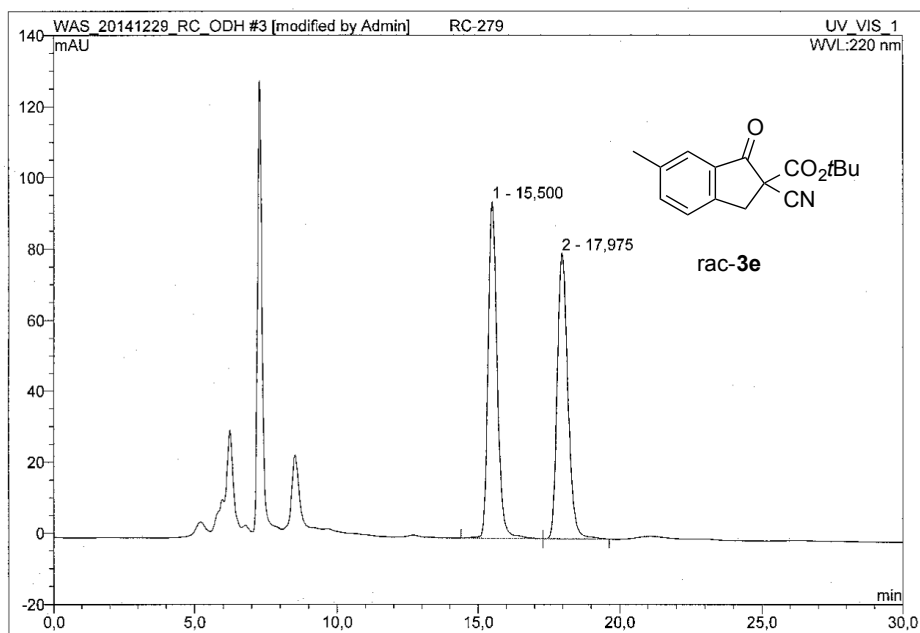

| No.           | Ret.Time<br>min | Peak Name | Height<br>mAU | Area<br>mAU*min | Rel.Area<br>% | Amount | Type |
|---------------|-----------------|-----------|---------------|-----------------|---------------|--------|------|
| 1             | 15,50           | n.a.      | 94,666        | 35,404          | 50,29         | n.a.   | BMB  |
| 2             | 17,98           | n.a.      | 80,364        | 34,999          | 49,71         | n.a.   | bMB  |
| <b>Total:</b> |                 |           | 175,030       | 70,403          | 100,00        | 0,000  |      |

**2 RC-280**

|                  |                       |                     |          |
|------------------|-----------------------|---------------------|----------|
| Sample Name:     | RC-280                | Injection Volume:   | 10,0     |
| Vial Number:     | RA2                   | Channel:            | UV_VIS_1 |
| Sample Type:     | unknown               | Wavelength:         | 220      |
| Control Program: | OD_H_30Min_9_1_flow05 | Bandwidth:          | n.a.     |
| Quantif. Method: | OD_H                  | Temperature/Column: | 10       |
| Recording Time:  | 31.12.2014 16:00      | Flow ml/min:        | 0,500    |
| Run Time (min):  | 30,00                 | Sample Amount:      | 1,0000   |

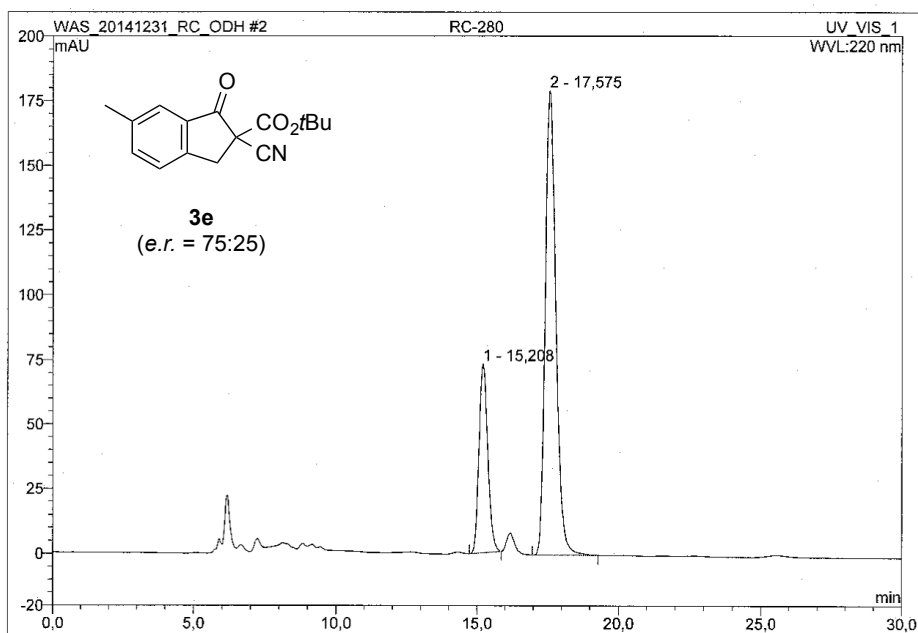

| No.           | Ret.Time<br>min | Peak Name | Height<br>mAU | Area<br>mAU*min | Rel.Area<br>% | Amount | Type |
|---------------|-----------------|-----------|---------------|-----------------|---------------|--------|------|
| 1             | 15,21           | n.a.      | 73,085        | 26,232          | 25,21         | n.a.   | BMB  |
| 2             | 17,58           | n.a.      | 179,314       | 77,827          | 74,79         | n.a.   | BMB  |
| <b>Total:</b> |                 |           | 252,399       | 104,059         | 100,00        | 0,000  |      |



**4 RC-281**

|                  |                       |                     |          |
|------------------|-----------------------|---------------------|----------|
| Sample Name:     | RC-281                | Injection Volume:   | 10,0     |
| Vial Number:     | RA4                   | Channel:            | UV_VIS_2 |
| Sample Type:     | unknown               | Wavelength:         | 250      |
| Control Program: | OD_H_30Min_9_1_flow05 | Bandwidth:          | n.a.     |
| Quantif. Method: | OD_H                  | Temperature/Column: | 10       |
| Recording Time:  | 31.12.2014 17:07      | Flow ml/min:        | 0,500    |
| Run Time (min):  | 30,00                 | Sample Amount:      | 1,0000   |

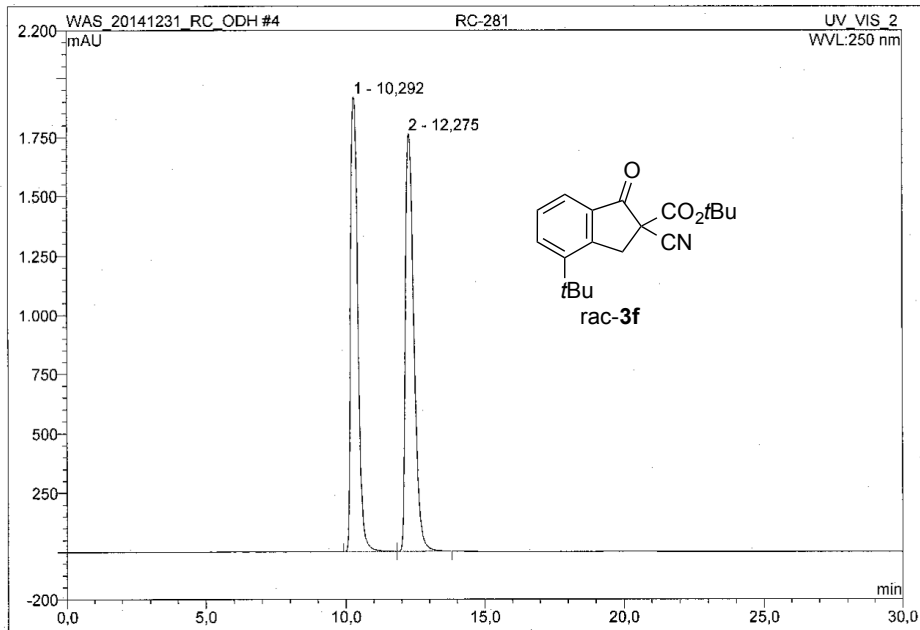

| No.           | Ret.Time<br>min | Peak Name | Height<br>mAU | Area<br>mAU*min | Rel.Area<br>% | Amount | Type |
|---------------|-----------------|-----------|---------------|-----------------|---------------|--------|------|
| 1             | 10,29           | n.a.      | 1918,356      | 579,269         | 47,72         | n.a.   | BM   |
| 2             | 12,28           | n.a.      | 1763,170      | 634,578         | 52,28         | n.a.   | MB   |
| <b>Total:</b> |                 |           | 3681,526      | 1213,847        | 100,00        | 0,000  |      |

**5 RC-282**

|                  |                       |                     |          |
|------------------|-----------------------|---------------------|----------|
| Sample Name:     | RC-282                | Injection Volume:   | 10,0     |
| Vial Number:     | RA5                   | Channel:            | UV_VIS_2 |
| Sample Type:     | unknown               | Wavelength:         | 250      |
| Control Program: | OD_H_30Min_9_1_flow05 | Bandwidth:          | n.a.     |
| Quantif. Method: | OD_H                  | Temperature/Column: | 10       |
| Recording Time:  | 31.12.2014 17:38      | Flow ml/min:        | 0,500    |
| Run Time (min):  | 28,58                 | Sample Amount:      | 1,0000   |

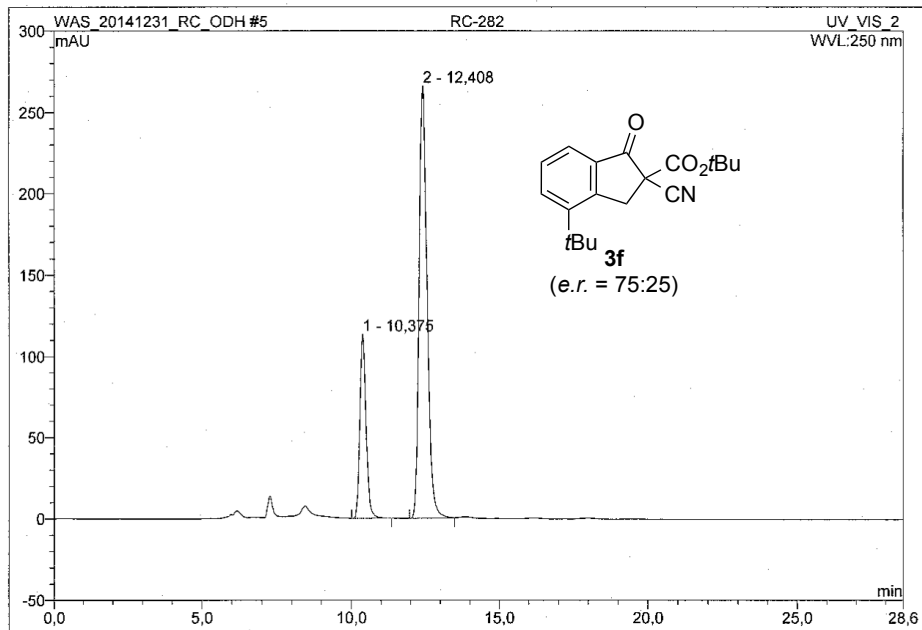

| No.           | Ret.Time<br>min | Peak Name | Height<br>mAU | Area<br>mAU*min | Rel.Area<br>% | Amount | Type |
|---------------|-----------------|-----------|---------------|-----------------|---------------|--------|------|
| 1             | 10,38           | n.a.      | 113,483       | 27,730          | 25,01         | n.a.   | BMB  |
| 2             | 12,41           | n.a.      | 265,909       | 83,143          | 74,99         | n.a.   | BMB  |
| <b>Total:</b> |                 |           | 379,393       | 110,873         | 100,00        | 0,000  |      |

**1 RC-277**

|                  |                        |                   |          |
|------------------|------------------------|-------------------|----------|
| Sample Name:     | RC-277                 | Injection Volume: | 10,0     |
| Vial Number:     | RA1                    | Channel:          | UV_VIS_1 |
| Sample Type:     | unknown                | Wavelength:       | n.a.     |
| Control Program: | AD_H_60Min_9_1_flow080 | Bandwidth:        | n.a.     |
| Quantif. Method: | AD_H                   | Dilution Factor:  | 1,0000   |
| Recording Time:  | 3.1.2015 17:55         | Sample Weight:    | 1,0000   |
| Run Time (min):  | 31,90                  | Sample Amount:    | 1,0000   |

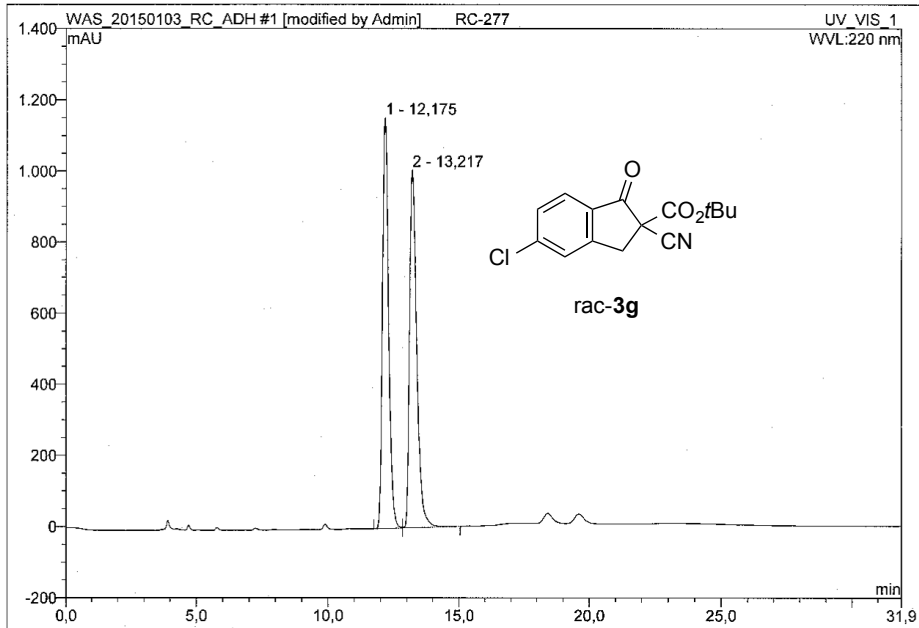

| No.           | Ret.Time<br>min | Peak Name | Height<br>mAU | Area<br>mAU*min | Rel.Area<br>% | Amount | Type |
|---------------|-----------------|-----------|---------------|-----------------|---------------|--------|------|
| 1             | 12,18           | n.a.      | 1154,629      | 313,497         | 49,24         | n.a.   | BM   |
| 2             | 13,22           | n.a.      | 1005,741      | 323,112         | 50,76         | n.a.   | MB   |
| <b>Total:</b> |                 |           | 2160,370      | 636,609         | 100,00        | 0,000  |      |

**2 RC-278**

|                  |                        |                   |          |
|------------------|------------------------|-------------------|----------|
| Sample Name:     | RC-278                 | Injection Volume: | 10,0     |
| Vial Number:     | RA2                    | Channel:          | UV_VIS_1 |
| Sample Type:     | unknown                | Wavelength:       | n.a.     |
| Control Program: | AD_H_60Min_9_1_flow080 | Bandwidth:        | n.a.     |
| Quantif. Method: | AD_H                   | Dilution Factor:  | 1,0000   |
| Recording Time:  | 3.1.2015 18:29         | Sample Weight:    | 1,0000   |
| Run Time (min):  | 36,72                  | Sample Amount:    | 1,0000   |

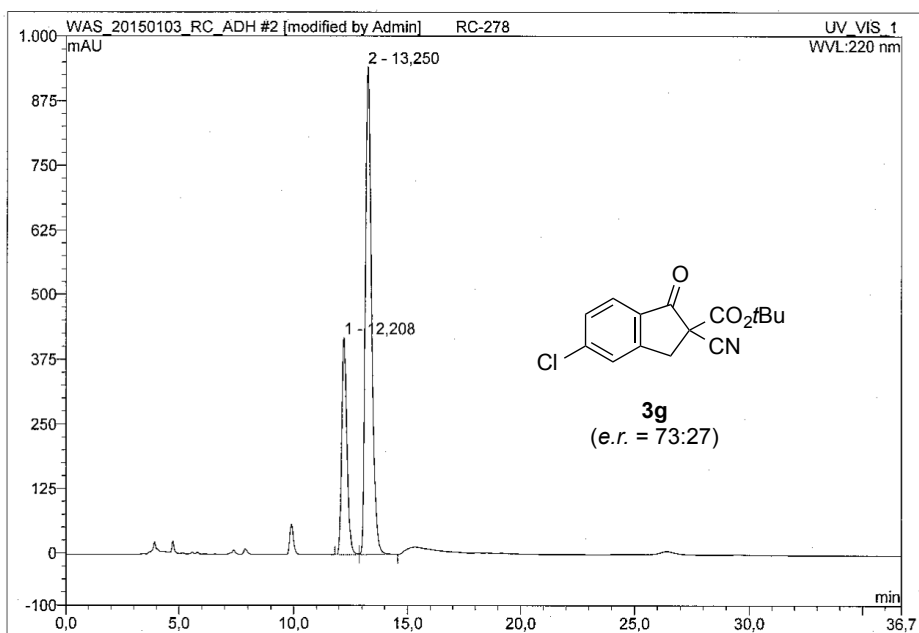

| No.           | Ret.Time<br>min | Peak Name | Height<br>mAU | Area<br>mAU*min | Rel.Area<br>% | Amount | Type |
|---------------|-----------------|-----------|---------------|-----------------|---------------|--------|------|
| 1             | 12,21           | n.a.      | 419,932       | 110,943         | 27,11         | n.a.   | BM   |
| 2             | 13,25           | n.a.      | 943,421       | 298,313         | 72,89         | n.a.   | MB   |
| <b>Total:</b> |                 |           | 1363,353      | 409,257         | 100,00        | 0,000  |      |

**1 RC-285**

|                  |                        |                   |          |
|------------------|------------------------|-------------------|----------|
| Sample Name:     | RC-285                 | Injection Volume: | 10,0     |
| Vial Number:     | RA1                    | Channel:          | UV_VIS_1 |
| Sample Type:     | unknown                | Wavelength:       | n.a.     |
| Control Program: | AD_H_60Min_9_1_flow080 | Bandwidth:        | n.a.     |
| Quantif. Method: | AD_H                   | Dilution Factor:  | 1,0000   |
| Recording Time:  | 5.1.2015 15:21         | Sample Weight:    | 1,0000   |
| Run Time (min):  | 18,28                  | Sample Amount:    | 1,0000   |

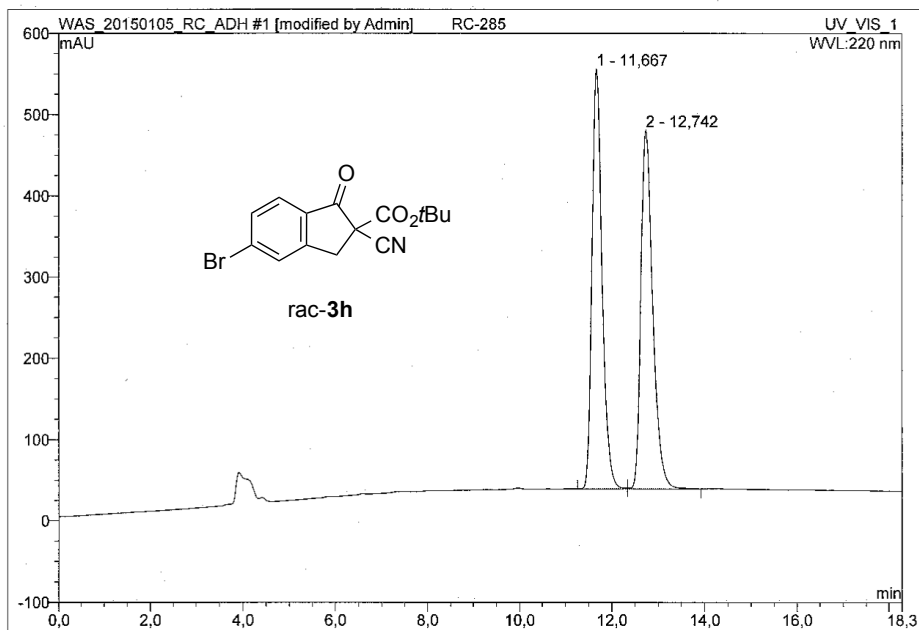

| No.           | Ret.Time<br>min | Peak Name | Height<br>mAU | Area<br>mAU*min | Rel.Area<br>% | Amount | Type |
|---------------|-----------------|-----------|---------------|-----------------|---------------|--------|------|
| 1             | 11,67           | n.a.      | 516,767       | 130,946         | 49,96         | n.a.   | BM   |
| 2             | 12,74           | n.a.      | 441,159       | 131,171         | 50,04         | n.a.   | MB   |
| <b>Total:</b> |                 |           | 957,926       | 262,117         | 100,00        | 0,000  |      |

**2 RC-286**

|                  |                        |                   |          |
|------------------|------------------------|-------------------|----------|
| Sample Name:     | RC-286                 | Injection Volume: | 10,0     |
| Vial Number:     | RA2                    | Channel:          | UV_VIS_1 |
| Sample Type:     | unknown                | Wavelength:       | n.a.     |
| Control Program: | AD_H_60Min_9_1_flow080 | Bandwidth:        | n.a.     |
| Quantif. Method: | AD_H                   | Dilution Factor:  | 1,0000   |
| Recording Time:  | 5.1.2015 15:41         | Sample Weight:    | 1,0000   |
| Run Time (min):  | 21,18                  | Sample Amount:    | 1,0000   |

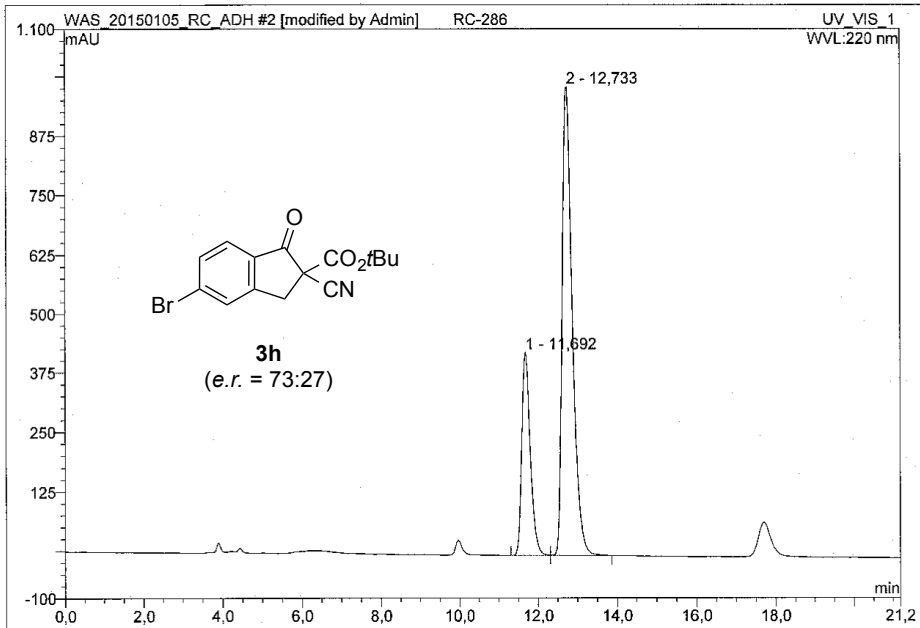

| No.           | Ret.Time<br>min | Peak Name | Height<br>mAU | Area<br>mAU*min | Rel.Area<br>% | Amount | Type |
|---------------|-----------------|-----------|---------------|-----------------|---------------|--------|------|
| 1             | 11,69           | n.a.      | 427,560       | 108,338         | 26,98         | n.a.   | BM   |
| 2             | 12,73           | n.a.      | 988,847       | 293,207         | 73,02         | n.a.   | MB   |
| <b>Total:</b> |                 |           | 1416,407      | 401,545         | 100,00        | 0,000  |      |
